1 Neural signatures of value comparison in human cingulate cortex during  
2 decisions requiring an effort-reward trade-off

3 Short title: Decision-making with motor costs in human dACC

4 Miriam C Klein-Flügge<sup>1,2\*</sup>, Steven W Kennerley<sup>1</sup>, Karl Friston<sup>3</sup>, Sven Bestmann<sup>1</sup>

5 1 Sobell Department of Motor Neuroscience and Movement Disorders, UCL Institute of  
6 Neurology, University College London (UCL), 33 Queen Square, London, WC1N3BG, United  
7 Kingdom

8 2 Department of Experimental Psychology, University of Oxford, 9 South Parks Road, OX1 3UD  
9 Oxford, United Kingdom

10 3 Wellcome Trust Centre for Neuroimaging, UCL Institute of Neurology, University College  
11 London (UCL), 12 Queen Square, London, WC1N3BG, United Kingdom

12 \* Corresponding author: Miriam C Klein-Flügge, Department of Experimental Psychology,  
13 University of Oxford, 9 South Parks Road, OX1 3UD Oxford, United Kingdom, miriam.klein-  
14 flugge@psy.ox.ac.uk, Phone: +447964560986

15 Number of pages: 45

16 Number of figures: 5

17 Number of words for Abstract: 250; Introduction: 628; Discussion: 1514

18 Conflict of interest: The authors declare no competing financial interests.

19 Acknowledgements: MCKF, SWK and KF were supported by the Wellcome Trust (MCKF:

20 086120/Z/08/Z; SWK 096689/Z/11/Z; KF: 088130/Z/09/Z and 091593/Z/10/Z); SB was

21 supported by the European Research Council (ERC; ActSelectContext 260424). Conceived and

22 designed the experiments: MCK SWK SB. Performed the experiments: MCK. Analysed the data:

23 MCK. Contributed reagents/materials/analysis tools: KF. Wrote the paper: MCK SWK KF SB.

24 We would like to thank Tim Behrens, Laurence Hunt, Matthew Rushworth, Marco Wittmann and

25 all our lab members for helpful discussions on the data, and the imaging and IT teams at the FIL

26 and Sobell Department for their support with data acquisition and handling.

27           **Abstract**

28           Integrating costs and benefits is crucial for optimal decision-making. While much is  
29 known about decisions that involve outcome-related costs (e.g., delay, risk), many of our choices  
30 are attached to actions and require an evaluation of the associated motor costs. Yet how the brain  
31 incorporates motor costs into choices remains largely unclear. We used human functional  
32 magnetic resonance imaging during choices involving monetary reward and physical effort to  
33 identify brain regions that serve as a choice comparator for effort-reward trade-offs. By  
34 independently varying both options' effort and reward levels, we were able to identify the neural  
35 signature of a comparator mechanism. A network involving supplementary motor area (SMA)  
36 and the caudal portion of dorsal anterior cingulate cortex (dACC) encoded the difference in  
37 reward (positively) and effort levels (negatively) between chosen and unchosen choice options.  
38 We next modelled effort-discounted subjective values using a novel behavioural model. This  
39 revealed that the same network of regions involving dACC and SMA encoded the difference  
40 between the chosen and unchosen options' subjective values, and that activity was best described  
41 using a concave model of effort-discounting. In addition, this signal reflected how precisely value  
42 determined participants' choices. By contrast, separate signals in SMA and ventro-medial PFC  
43 (vmPFC) correlated with participants' tendency to avoid effort and seek reward, respectively.  
44 This suggests that the critical neural signature of decision-making for choices involving motor  
45 costs is found in human cingulate cortex and not vmPFC as typically reported for outcome-based  
46 choice. Furthermore, distinct frontal circuits 'drive' behaviour towards reward-maximization and  
47 effort-minimization.

## 48            **Significance Statement**

49            The neural processes that govern the trade-off between expected benefits and motor costs  
50 remain largely unknown. This is striking because energetic requirements play an integral role in  
51 our day-to-day choices and instrumental behaviour, and a diminished willingness to exert effort is  
52 a characteristic feature of a range of neurological disorders. We use a new behavioural  
53 characterization of how humans trade-off reward-maximization with effort-minimization to  
54 examine the neural signatures that underpin such choices, using BOLD MRI neuroimaging data.  
55 We find the critical neural signature of decision-making, a signal that reflects the comparison of  
56 value between choice options, in human cingulate cortex, whereas two distinct brain circuits  
57 ‘drive’ behaviour towards reward-maximization or effort-minimization.

## 58            **Introduction**

59            Cost-benefit decisions are a central aspect of flexible goal-directed behaviour. One  
60 particularly well-studied neural system concerns choices where costs are tied to the reward  
61 outcomes (e.g., risk, delay; Kable and Glimcher, 2007; Boorman et al., 2009; Philiastides et al.,  
62 2010). Much less is known about choices tied to physical effort costs, despite their ubiquitous  
63 presence in human and animal behaviour. The intrinsic relationship between effort and action  
64 may engage neural circuits distinct from those involved in other value-based choice  
65 computations.

66            There is growing consensus that different types of value-guided decisions are  
67 underpinned by distinct neural systems, depending on the type of information that needs to be  
68 processed (e.g., Rudebeck et al., 2008; Camille et al., 2011b; Kennerley et al., 2011; Pastor-  
69 Bernier and Cisek, 2011; Rushworth et al., 2012). For example, activity in the ventro-medial  
70 prefrontal cortex (vmPFC) carries a signature of choice comparison (chosen-unchosen value) for  
71 decisions between abstract goods or when costs are tied to the outcome (Kable and Glimcher,  
72 2007; Boorman et al., 2009; Fitzgerald et al., 2009; Philiastides et al., 2010; Hunt et al., 2012;  
73 Kolling et al., 2012; Clithero and Rangel, 2014; Strait et al., 2014). By contrast, such value  
74 difference signals are found more dorsally in medial frontal cortex when deciding between  
75 exploration versus exploitation (Kolling et al., 2012).

76            Choices requiring the evaluation of physical effort rest on representations of the required  
77 actions and their energetic costs, and thus likely require an evaluation of the internal state of the  
78 agent. This is distinct from choices based solely on reward outcomes (Rangel and Hare, 2010).  
79 Indeed, the proposed network for evaluating motor costs comprises brain regions involved in  
80 action planning and execution, including the cingulate cortex, putamen, and supplementary motor

81 area (SMA) (Croxson et al., 2009; Kurniawan et al., 2010; Prévost et al., 2010; Kurniawan et al.,  
82 2013; Burke et al., 2013; Bonnelle et al., 2016). Neurons in anterior cingulate cortex (ACC)  
83 encode information about rewards, effort costs, and actions (Matsumoto et al., 2003; Kennerley  
84 and Wallis, 2009; Luk and Wallis, 2009; Hayden and Platt, 2010), and integrate this information  
85 into an economic value signal (Hillman and Bilkey, 2010; Hosokawa et al., 2013). Moreover,  
86 lesions to ACC profoundly impair choices of effortful options and between action values (Walton  
87 et al., 2003, 2006, 2009; Schweimer and Hauber, 2005; Kennerley et al., 2006; Rudebeck et al.,  
88 2006, 2008; Camille et al., 2011b).

89         While these studies highlight the importance of motor-related structures in representing  
90 effort information, it remains unclear whether computations in these regions are indeed related to  
91 *comparing* effort values (or effort-discounted net values) – the essential neural signature which  
92 would implicate these areas in decision making. Indeed, these regions could simply *represent*  
93 effort which is then passed onto other regions for value comparison processes. A number of  
94 questions thus arise. First, is information about reward and effort compared in separate neural  
95 structures, or is this information fed to a region that compares options based on their integrated  
96 value? Second, do regions that preferably encode reward or effort have a direct influence on  
97 determining choice? Finally, assuming separate neural systems are present for influencing  
98 choices based on reward versus effort, how does the brain arbitrate between these signals when  
99 reward and effort information support opposing choices?

100         Here we employed a task designed to identify signatures of a choice comparison for  
101 effort-based decisions in humans using fMRI, and to test whether different neural circuits ‘drive’  
102 choices towards reward-maximization versus energy-minimization. We show that the neural  
103 substrates of effort-based choice are distinct from those computing outcome-related choices:  
104 well-known reward and effort circuits centred on vmPFC and SMA bias choices to be more

105 driven by benefits or motor costs, respectively, with a region in cingulate cortex integrating cost  
106 and benefit information and comparing options based on these integrated subjective values.

## 107 **Materials and methods**

### 108 *Participants*

109 24 participants with no history of psychiatric or neurological disease, and with normal or  
110 corrected-to-normal vision took part in this study (mean age  $28 \pm 1$ , age range 19-38, 11 females).  
111 All participants gave written informed consent and consent to publish prior to the start of the  
112 experiment; the study was approved by the local research ethics committee at University College  
113 London (UCL; 1825/003) and conducted in accordance with the declaration of Helsinki.  
114 Participants were reimbursed with £15 for their time and in addition they accumulated average  
115 winnings of  $\pounds 7.16 \pm 0.11$  during each of the two blocks of the task (the maximum winnings per  
116 block were scaled to £8; the resulting average total pay was £29.32). Three participants were  
117 excluded from the analysis, one for failing to stay awake during scanning, and two due to  
118 excessive head movements (summed movement in any direction and run  $>40\text{mm}$ ). All analyses  
119 were performed on the remaining 21 participants.

### 120 *Behavioural task*

121 Participants received both written and oral task instructions. They were asked to make a  
122 series of choices between two options, which independently varied in required grip force  
123 ('effort') and reward magnitude (**Figure 1A**). The reward magnitude was shown as a number  
124 (range: 10-40 points; roughly corresponding to pence) and required force levels were indicated as  
125 the height of a horizontal bar (range: 20-80% of the participant's maximum grip force).

126 Each trial comprised an offer, response and outcome phase; a subset of 30% of trials also  
127 contained an effort production phase. During the 'offer' phase, participants decided which option  
128 to choose but they were not yet able to indicate their response. There were two trial types (50%

129 each): ‘ACT’ (action) and ‘ABS’ (abstract). In ACT trials, the two choice options were presented  
130 to the left and right of fixation, and thus in a horizontal or ‘action space’ configuration in which  
131 the side of presentation directly related to the hand with which to choose that option. In ABS  
132 trials, choice options were shown above and below fixation, and thus in a vertical or ‘goods  
133 space’ arrangement that did not reveal the required action. In both conditions, stimuli were  
134 presented close to the centre of the screen and participants did not need to move their eyes to  
135 inspect them. To maximally distinguish the hemodynamic response from the offer and response  
136 phase, the duration of the offer phase varied between 4-11s (Poisson distributed; mean 6s).

137         The response phase started when the fixation cross turned red. In ACT trials, the  
138 arrangement of the two choice options remained the same; in ‘ABS’ trials, the two options at the  
139 top and bottom were switched to the left and right of fixation (with a 50/50% chance), thus  
140 revealing the required action mapping. Choices were indicated by a brief squeeze of a grip device  
141 (see below for details) on the corresponding side (maximum response time: 3s; required force  
142 level: 35% of maximum voluntary contraction; MVC). Note that ACT and ABS trials were  
143 merged for all analyses because no significant differences were found for the tests reported in this  
144 manuscript.

145         On 70% of trials, no effort was required: as soon as participants indicated their choice, the  
146 unchosen option disappeared, and the message ‘no force’ was displayed for 500ms. The next trial  
147 commenced after a variable delay (ITI: 2-13s; Poisson distributed; mean: 5s). On the remaining  
148 30% of trials, a power grip of 12s was required (‘effort’). Again, the unchosen option disappeared  
149 but now a thermometer appeared centrally and displayed the target force level of the chosen  
150 option. Participants were given on-line visual feedback about the applied force level using  
151 changing fluid levels in the thermometer. On successful application of the required force for at  
152 least 80% of the 12s period, a green tick appeared (500ms; ‘outcome’ phase; delay preceding  
153 outcome: 0.5-1.5s uniform) and the reward magnitude of the chosen option was added to the total



154 winnings. Otherwise, the total winnings remained unchanged (red cross: 500ms). Because  
155 participants were almost always successful in applying the required force on effort trials  
156 (accuracy:  $99.30 \pm 0.004\%$ ; only four participants made any mistakes), there was no confound  
157 between effort level and risk/reward expectation.

158         The sensitivity of the grip device was manipulated between trials ('high' or 'low'). A high  
159 gain meant that the grippers were twice as sensitive as for a low gain, and thus the same force  
160 deviation doubled the rate of change in the thermometer's fluid level. While this manipulation  
161 was introduced to study interactions between mental and physical effort, none of our behavioural  
162 or fMRI analyses revealed any significant effects of gain during the choice phase, which is the  
163 focus of the present paper.

164         To summarize, our task involved several important features: (a) as our aim was to  
165 specifically examine value comparison mechanisms during effort-based choice, we manipulated  
166 both options' values and thus the expected values of the two offers had to be computed and  
167 compared on-line in each trial, unlike in previous experiments (Crosson et al., 2009; Kurniawan  
168 et al., 2010, 2013; Prévost et al., 2010; Burke et al., 2013; Bonnelle et al., 2016); (b) the decision  
169 process and the resulting motor response were separated in time (**Figure 1A**). This enabled us to  
170 examine the value comparison in the absence of – and not confounded with – processes related to  
171 action execution; (c) both reward and effort levels were varied parametrically rather than in  
172 discrete steps, and orthogonally to each other, thereby granting high sensitivity for the  
173 identification of effort and reward signals, respectively; (d) efforts were only realised on a subset  
174 of trials, ensuring that decisions were not influenced by fatigue (Klein-Flügge et al., 2015).  
175 Importantly, however, at the time of choice participants did not know whether a given trial was  
176 real or hypothetical and therefore the optimal strategy was to treat each trial as potentially real;  
177 (e) the duration of the grip on effort trials (12s) had been determined in pilot experiments and

178 ensured that force levels were factored into the choice process. Moreover, the fixed duration of  
179 grip force also meant that effort costs were not confounded with temporal costs.

### 180 *Scanning procedure*

181 Prior to scanning, force levels were adjusted to each individual's grip strength using a  
182 grip calibration. Participants were seated in front of a computer monitor and held a custom-made  
183 grip device in both hands. Each participant's baseline (no grip) and MVC were measured over a  
184 period of 3s, separately for both hands. The measured values were used to define individual force  
185 ranges (0-100%) for each hand, which were then used in the behavioural task, both pre-scanning  
186 and during scanning.

187 Before entering the scanner, participants completed a training session consisting of one  
188 block of the behavioural task (112 trials, ~30 minutes). This gave them the opportunity to  
189 experience different force levels and to become familiar with the task. Importantly, it also  
190 ensured that decisions made subsequently in the scanner would not be influenced by uncertainty  
191 about the difficulty of the displayed force levels. In the scanner, participants completed two  
192 blocks of the task (overall task duration ~60 minutes; 224 choices).

### 193 *Generation of choice stimuli*

194 Because our main question related to the encoding of value difference signals during  
195 effort-based choices, the generation of suitable choice stimuli was a key part of the experimental  
196 design. Choice options were identical for every individual and were chosen such that they would  
197 minimise the correlation between the fMRI regressors for chosen and unchosen effort, reward  
198 magnitude and value (obtained mean correlations post-scanning: effort: -0.23; reward magnitude:  
199 0.11; value: 0.43; **Figure 1C**). We also ensured that left and right efforts, reward magnitudes and

200 values were decorrelated to be able to identify action value signals (effort: 0.28; reward  
201 magnitude: 0.05; value: 0.07). We simulated several individuals using a previously suggested  
202 value function for effort-based choice (Prévost et al., 2010). Stimuli were optimized with the  
203 following additional constraints: either the efforts or the reward magnitudes had to differ by at  
204 least 0.1 on each trial, the range of efforts and reward magnitudes was [0.2 to 0.8] x MVC or 0-50  
205 points, respectively, and the overall expected value for both hands was comparable. Furthermore,  
206 in 85% of trials the larger reward was paired with the larger effort level, and the smaller reward  
207 with the smaller effort level, making the choice hard, but on 15% of trials, the larger reward was  
208 associated with the smaller effort level ('no-brainer'). The two choice sets that minimized the  
209 correlations between our regressors of interest were used for the fMRI experiment. A third  
210 stimulus set was saved for the behavioural training prior to scanning.

211 Preliminary fMRI analyses revealed that we had overlooked a bias in our stimuli. In the  
212 last third of trials of the second block, the overall offer value  $((\text{magnitude}_1/\text{effort}_1 +$   
213  $\text{magnitude}_2/\text{effort}_2)/2)$  decreased steadily, leading to skewed contrast estimates. Therefore the  
214 last 40 trials were discarded from all analyses.

215 Note that we refer to choices in this study as 'effort-based' to highlight the distinction  
216 from purely outcome/reward-based choices or choices involving other types of costs (e.g., delay-  
217 based). But of course, in our task, all choices were effort- as well as reward-based.

### 218 *Recordings of grip strength*

219 The grippers were custom-made and consisted of two force transducers (FSG15N1A,  
220 Honeywell, NJ, USA) placed between two moulded plastic bars (see also Ward and Frackowiak,  
221 2003). A continuous recording of the differential voltage signal, proportional to the exerted force,  
222 was acquired, fed into a signal conditioner (CED 1902, Cambridge Electronic Design,

223 Cambridge, UK), digitized (CED 1401, Cambridge Electronic Design, Cambridge, UK) and fed  
224 into the computer running the stimulus presentation. This enabled us, during effort trials, to give  
225 online feedback about the exerted force using the thermometer display.

## 226 *Behavioural analysis*

227 To examine which task variables affected participants' choice behaviour, a logistic  
228 regression was fitted to participants' choices (1=RH, 0=LH) using the following nine regressors:  
229 a RH-LH bias (constant term); condition (ABS or ACT); gain (high or low); LH-effort on  
230 previous trial; RH-effort on previous trial; reward magnitude left; reward magnitude right; effort  
231 left; effort right. T-tests performed across participants on the obtained regression coefficients  
232 were adjusted for multiple comparisons using Bonferroni correction. Since only reward  
233 magnitudes and efforts influenced behaviour significantly (see Results), the logistic regression  
234 models performed for the analysis of the neural data below (equations (2) and (3)) only contained  
235 these variables (or their amalgamation into combined value).

236 To examine the influence of reward and effort on participants' choice behaviour in more  
237 depth, we tested whether participants indeed weighed up effort against reward, and whether they  
238 treated reward and effort as continuous variables. If reward and effort compete for their influence  
239 on choice, then the influence of effort should become larger as the reward difference becomes  
240 smaller, and vice versa. Thus, we performed a median split of our trials according to the absolute  
241 difference in reward (or effort) between the two choice options. We then calculated the likelihood  
242 of choosing an option as a function of its effort (reward) level, separately for the two sets of trials.  
243 Effort (reward) values were distributed across ten bins with equal spacing; this binning was  
244 independent of the effort (reward) level of the alternative option. For statistical comparisons, we  
245 fitted a slope for each participant to the mean of all bins. T-tests were performed on the resulting  
246 four slopes testing for the influence of (a) effort in trials with small reward difference, (b) effort

247 in trials with large reward difference, (c) reward in trials with small effort difference, and (d)  
248 reward in trials with large effort difference. We report uncorrected p-values but all conclusions  
249 hold when correcting for six comparisons (a-d against zero; a versus b; c versus d).

250 We also tested for effects of fatigue: the above logistic regression suggested that choices  
251 were not affected by whether or not the previous trial required the production of effort, as shown  
252 previously in this task (Klein-Flügge et al., 2015). More detailed analyses examined the  
253 percentage of trials in which the higher effort option was chosen (running average across 20  
254 trials), and participants' performance in reaching and maintaining the required force. The latter  
255 was measured as the time point when 10 consecutive samples were above force criterion (the  
256 shorter, the sooner), and as the percentage of time out of 12s that participants were at criterion,  
257 respectively. For all measures, we compared the first and last third of trials. Here we report the  
258 comparison between the first and last third across the entire experiment. However, separate  
259 analyses – using the first and last third of just the first or the second block – revealed identical  
260 results. There were no effects of fatigue: in all cases participants either improved or stayed  
261 unchanged (% higher effort chosen: first third  $60.56\% \pm 1.94$ ; last third  $60.93\% \pm 2.79$ ,  $p=0.69$ ,  
262  $t_{20}=-0.40$ ; reaching the force threshold: first third  $0.83s \pm 0.04$ ; last third  $0.76s \pm 0.03$ ;  $p=0.01$ ,  
263  $t_{20}=2.82$ ; maintaining the force above threshold: first third  $92.49\% \pm 0.47$ ; last third  $93.51\% \pm 0.28$ ;  
264  $p=0.01$ ,  $t_{20}=-2.84$ ).

265 To derive participants' subjective values for the offers presented on each trial, we  
266 developed an effort discounting model (Klein-Flügge et al., 2015). This model has been shown to  
267 provide better fits than the hyperbolic model previously suggested for effort discounting (Prévost  
268 et al., 2010) both here and in our previously published work (Klein-Flügge et al., 2015).  
269 Crucially, its shape is initially concave, unlike a hyperbolic function, allowing for smaller  
270 devaluations of value for effort increases at weak force levels, and steeper devaluations at higher

271 force levels, which is intuitive for effort discounting and biologically plausible. Our model  
272 follows the following form:

$$V = M \left( 1 - \left( \frac{1}{1 + e^{-k(C-p)}} - \frac{1}{1 + e^{kp}} \right) \left( 1 + \frac{1}{e^{kp}} \right) \right) \quad (1)$$

273  $V$  is subjective value,  $C$  is the effort cost,  $M$  the reward magnitude, and  $k$  and  $p$  are free  
274 parameters.  $C$  and  $M$  are scaled between 0 and 1, corresponding to 0% MVC and 100% MVC,  
275 and 0 points and 50 points, respectively. A simple logistic regression on the difference in  
276 subjective values between choice options was then used to fit participants' choices; in other  
277 words, the following function ('softmax rule') was used to transform the subjective values  $V1$  and  
278  $V2$  of the two options offered on each trial into the probability of choosing option 1.

$$P(\text{choice1}) = \frac{1}{1 + e^{-\beta_V(V1-V2)}} \quad (2)$$

279 The free parameters (slope  $k$ , turning point  $p$ , softmax precision parameter  $\beta_V$ ), were fitted  
280 using the Variational Laplace algorithm (Penny et al., 2003; Friston et al., 2007). This is a  
281 Bayesian estimation method which incorporates Gaussian priors over model parameters and uses  
282 a Gaussian approximation to the posterior density. The parameters of the posterior are iteratively  
283 updated using an adaptive step size, gradient ascent approach. Importantly, the algorithm also  
284 provides the free energy  $F$ , which is an approximation to the model evidence. The model  
285 evidence is the probability of obtaining the observed choice data, given the model. To maximize  
286 our chances to find global, rather than local maxima with this gradient ascent algorithm,  
287 parameter estimation was repeated over a grid of initialization values, with eight initializations  
288 per parameter. The optimal set of parameters, i.e., that obtained from the initialization that  
289 resulted in the maximal free energy, was used for modelling subjective values in the fMRI data.

290 For our BOLD analyses, the only relevant parameter was  $\beta_V$ . It reflects the weight (i.e., strength)  
291 with which participants' choices are driven by subjective value, rather than noise; it is also often  
292 referred to as precision or inverse softmax temperature. Fitting ACT and ABS, or high and low  
293 gain trials separately did not lead to any significant differences between conditions (paired t-tests  
294 on parameter estimates between conditions all  $p>0.3$ ), and did not improve the model evidence  
295 (paired t-test on the model evidence; fitting conditions separately or not:  $p=0.82$ ; fitting gain  
296 separately or not:  $p=0.63$ ). Trials were therefore pooled for model fitting. Once fitted, the  
297 performance of our new model was compared to that of the hyperbolic model and two parameter-  
298 free models (difference: reward-effort; quotient: reward/effort) as described in (Klein-Flügge et  
299 al., 2015) using a formal model comparison.

### 300 *fMRI data acquisition and pre-processing*

301 The fMRI methods followed standard procedures (e.g., Klein-Flügge et al., 2013): T2\*-  
302 weighted echo-planar images (EPI) with blood oxygenation level-dependent (BOLD) contrast  
303 were acquired using a 12-channel head coil on a 3Tesla Trio MRI scanner (Siemens, Erlangen,  
304 Germany). A special sequence was used to minimise signal drop out in the OFC region  
305 (Weiskopf et al., 2006) and included an echo time (TE) of 30ms, a tilt of  $30^\circ$  relative to the  
306 rostral-caudal axis and a local z-shim with a moment of -0.4 mT/m ms applied to the OFC region.  
307 To achieve whole-brain coverage, we used 45 transverse slices of 2mm thickness, with an inter-  
308 slice gap of 1mm and in-plane resolution of 3x3 mm, and collected slices in an ascending order.  
309 This led to a repetition time (TR) of 3.15 seconds. In each session, a maximum of 630 volumes  
310 were collected (~33 minutes) and the first five volumes of each block were discarded to allow for  
311 T1 equilibration effects. A single T1-weighted structural image with  $1\text{mm}^3$  voxel resolution was  
312 acquired and co-registered with the EPI images to permit anatomical localisation. A fieldmap  
313 with dual echo-time images (TE1= 10ms, TE2 = 14.76ms, whole brain coverage, voxel size

314 3x3x3 mm) was obtained for each subject to allow for corrections in geometric distortions  
315 induced in the EPIs at high field strength (Andersson et al., 2001).

316 During the EPI acquisition, we also obtained several physiological measures. The cardiac  
317 pulse was recorded using an MRI-compatible pulse oximeter (Model 8600 F0, Nonin Medical,  
318 Inc. Plymouth, MN, USA), and thoracic movement was monitored using a custom-made  
319 pneumatic belt positioned around the abdomen. The pneumatic pressure changes were converted  
320 into an analogue voltage using a pressure transducer (Honeywell International Inc. Morristown,  
321 NJ, USAir) before digitization, as reported in (Hutton et al., 2011).

322 Pre-processing and statistical analyses were carried out using SPM8 (Wellcome Trust  
323 Centre for Neuroimaging, London, UK, [www.fil.ion.ucl.ac.uk/spm](http://www.fil.ion.ucl.ac.uk/spm)). Image pre-processing  
324 consisted of realignment of images to the first volume, distortion correction using fieldmaps, slice  
325 time correction, conservative independent component analysis to identify and remove obvious  
326 artefacts (using MELODIC in Fmrib's Software Library, <http://fsl.fmrib.ox.ac.uk/>), co-  
327 registration with the structural scan, normalisation to a standard MNI template, and smoothing  
328 using an 8mm full-width at half maximum Gaussian kernel.

### 329 *Data analysis – General Linear Model*

330 The first general linear model (GLM1) included twelve main event regressors. The offer  
331 phase was described using onsets for (i) ACT trials preparing a left response; (ii) ACT trials  
332 preparing a right response; and (iii) ABS trials. All three events were modelled using durations of  
333 2s and were each associated with four parametric modulators: the reward magnitude and effort of  
334 the chosen and unchosen option. Crucially, these four parametric modulators competed to explain  
335 common variance during the estimation, rather than being serially orthogonalised (in other words,  
336 we implicitly tested for effects that were unique to each parametric explanatory variable). The



337 response phase was described using four regressors for ‘no force’ trials (1s duration) and four  
338 regressors for effort production trials (12s duration): (iv-vii) no force  $ACT_{left}$ ,  $ACT_{right}$ ,  $ABS_{left}$ ,  
339  $ABS_{right}$ ; (viii-xi) effort production left (low gain), left (high gain), right (low gain), right (high  
340 gain). Finally, the outcome was modelled as a single regressor because the proportion of trials in  
341 which efforts were not produced successfully was negligible (median: 0; mean:  $0.43 \pm 0.22$  trials;  
342 only 4 of 21 participants had any unsuccessful trials).

343 In addition to event regressors, a total of 23 nuisance regressors were included to control  
344 for motion and physiological effects of no interest. First, to account for motion-related artefacts  
345 that had not been eliminated in rigid-body motion correction, the six motion regressors obtained  
346 during realignment were included. Second, to remove variance accounted for by cardiac and  
347 respiratory responses, a physiological noise model was constructed using an in-house Matlab  
348 toolbox (Hutton et al., 2011). Models for cardiac and respiratory phase and their aliased  
349 harmonics were based on RETROICOR (Glover et al., 2000). The model for changes in  
350 respiratory volume was based on (Birn et al., 2006). This resulted in 17 physiological regressors  
351 in total: ten for cardiac phase, six for respiratory phase, and one for respiratory volume.

352 The parameters of the hemodynamic response function (HRF) were modified to obtain a  
353 double-gamma HRF, with the standard settings in Fmrib’s Software Library  
354 (<http://fsl.fmrib.ox.ac.uk/>): delay to response 6, delay to undershoot: 16, dispersion of response:  
355 2.5; dispersion of undershoot: 4; ratio of response to undershoot: 6, length of kernel: 32 (all in  
356 seconds).

357 The second GLM (GLM2) was identical to the first, except that the four parametric  
358 regressors (reward magnitude and effort of the chosen and unchosen option) were replaced by the  
359 subjective model-derived values of the chosen and unchosen option. This allowed us to identify  
360 regions encoding the difference in subjective value between the offers.

361 Three further GLMs were fitted to the data to test whether the values derived from the  
362 sigmoidal model provide the best explanation of the measured BOLD signals. These GLMs were  
363 identical to GLM2 except that the parametric regressors for the values of the chosen and  
364 unchosen option derived from the sigmoidal model were replaced by either (a) the values derived  
365 from a hyperbolic model (GLM3), (b) the values derived from a parameter-free difference  
366 ‘reward-effort’ (GLM4), or (c) the values derived from a parameter-free quotient ‘reward/effort’  
367 (GLM5).

### 368 *Identifying signatures of choice computation*

369 Our first aim was to identify brain regions with BOLD signatures of choice computation  
370 (**Figure 2A**). Thus, we first identified brain regions that fulfilled the following two criteria  
371 (GLM1): (a) the BOLD signal correlated negatively with the difference in effort between chosen  
372 and unchosen options, and (b) the BOLD signal correlated positively with the difference in  
373 reward magnitude between chosen and unchosen options. Collectively, these two signals form the  
374 basis of a value difference signal because effort contributes negatively and reward magnitude  
375 contributes positively to overall value. Previous work has demonstrated, using predictions derived  
376 from a biophysical cortical attractor network, that at the level of large neural populations, as  
377 measured using human neuroimaging techniques such as fMRI or MEG, the characteristic  
378 signature of a choice comparison process is a value difference signal (Hunt et al., 2012). The  
379 responses predicted for harder and easier choices differ because the speed of the network  
380 computations varies as a function of choice difficulty (e.g., faster for high value difference).  
381 Thus, an area at the formal conjunction of the two contrasts described by (a) and (b) would carry  
382 the relevant signatures for computing a subjective value difference signal, a cardinal requirement  
383 for guiding choice. Importantly, while we reasoned that the choice computations in our specific  
384 task should follow similar principles as in Hunt et al. (2012), we expected this computation to  
385 occur in different regions because it would be based on the integration of a different type of

386 decision cost. In an additional analysis (**Figure 5**), for completeness, we also identified brain  
387 regions significant in the inverse contrast, i.e., a conjunction of positive effort and negative  
388 reward magnitude difference (Wunderlich et al., 2009; Hare et al., 2011).

### 389 *Regions of Interest and extraction of time courses*

390 For whole-brain analyses we used a FWE cluster-corrected threshold of  $p < 0.05$  (using a  
391 cluster-defining threshold of  $p < 0.01$  and a cluster threshold of 10 voxels). For a priori region of  
392 interest (ROI) analyses we used a small-volume corrected FWE cluster-level threshold of  $p < 0.05$   
393 in spheres of 5mm around previous coordinates, namely in left and right putamen ( $[\pm 26, -8, -2]$   
394 (Croxson et al., 2009)), SMA ( $[4 -6 58]$ , (Croxson et al., 2009)) and vmPFC ( $[-6, 48, -8]$   
395 (Boorman et al., 2009)).

396 BOLD time series were extracted from the pre-processed data of the identified regions by  
397 averaging the time series of all voxels that were significant at  $p < 0.001$  (uncorrected). Time series  
398 were up-sampled with a resolution of 315ms ( $1/10 * TR$ ) and split into trials for visual illustration  
399 of the described effects (e.g., **Figure 2B**).

400 At the suggestion of one reviewer, the two main analyses (conjunction of reward and  
401 inverse effort difference described above, and value difference contrast described below) were  
402 repeated in FSL using Flame1 because of differences between SPM and FSL in controlling for  
403 false positives when using cluster-level corrections (Eklund et al., 2015). For this control  
404 analysis, we imported the pre-processed (unsmoothed) images to FSL. We then used FSL's  
405 default smoothing kernel of 5mm and a cluster-forming threshold of  $z > 2.3$  (corresponding to  
406  $p < 0.01$ ; default in FSL). The obtained results are overlaid in **Figure 2A** and **2D**.

### 407 *Encoding of subjective value*

408 We next asked whether BOLD signal changes in the regions identified using the  
409 abovementioned conjunction could indeed be described by the subjective values derived from our  
410 custom-made behavioural model. We thus performed a whole-brain contrast identifying regions  
411 encoding the difference in subjective value between the chosen and unchosen option (GLM2;  
412 **Figure 2D**). To test whether the BOLD signal was better explained by subjective value as  
413 modelled using the sigmoidal function or three alternative models (hyperbolic; ‘difference’:  
414 reward-effort; ‘quotient’: reward/effort; GLM3-GLM5; **Figure 3B**), we calculated the difference  
415 between the value difference maps obtained on the first level for each participant (sigmoid vs  
416 hyperbolic; sigmoid vs difference; sigmoid vs quotient; **Figure 3C**). A standard second-level t-  
417 test was performed on the three resulting difference images and statistical significance evaluated  
418 as usual.

#### 419 *Relating neural and behavioural effects of value difference*

420 If it was indeed the case that the regions identified to encode value difference are  
421 involved in choice computation and as a result, inform behaviour, the BOLD value signal should  
422 systematically relate to behavioural measures of choice performance (Jocham et al., 2012;  
423 Kolling et al., 2012). To test this, we used the behavioural measure of the effect of value  
424 difference,  $\beta_V$ , as derived from the logistic regression analysis above (equation (2)). Importantly,  
425 before fitting  $\beta_V$ , model-derived subjective values were scaled between [0,1] for all participants  
426 so that any difference in the fitted regression coefficient  $\beta_V$  indicated how strongly value  
427 difference influenced behavioural choices in a given participant.  $\beta_V$  reflects how consistently  
428 participants choose the subjectively more valuable option. In other words, this parameter captures  
429 how strongly value rather than noise determines choice behaviour. To examine whether the size  
430 of the neural value difference signal carried behavioural relevance, the behavioural weights  $\beta_V$   
431 were then used as a covariate for the value difference contrast in a second level group analysis. At  
432 the whole-brain level we thus identified regions where the encoding of value difference was

433 significantly modulated by how strongly participants' choices were driven by subjective value  
434 (**Figure 2F**). This analysis was restricted to the regions that encoded value difference at the first  
435 level. For illustration of the effect, the neural signature of value difference (regression  
436 coefficients for chosen versus unchosen value at the peak time of 6s) was plotted against  $\beta_V$   
437 (**Figure 2F**).

#### 438 *Reward maximization versus effort minimization*

439 In our task, reward maximization is in conflict with effort minimization in almost all trials  
440 because the option that has a higher reward value is also associated with a higher effort level. To  
441 capture the separate behavioural influences of reward and effort for each participant, another  
442 logistic regression analysis was conducted, but now both the difference in offer magnitudes and  
443 in efforts were entered into the design matrix, rather than just their combination into value as in  
444 equation (2):

$$P(\text{choice1}) = \frac{1}{1 + e^{-[\beta_M(M1-M2) + \beta_E(E1-E2)]}} \quad (3)$$

445 Here,  $\beta_M$  is the weight or precision with which reward magnitude difference (M1-M2)  
446 influences choice, and  $\beta_E$  is the weight (precision) with which effort difference (E1-E2)  
447 influences choice.

448 Next, to identify which brain regions might bias the choice computation either towards  
449 reward or away from physical effort, we performed two independent tests. First, we used the  
450 behaviourally defined weights for effort,  $-\beta_E$ , as a covariate on the second level, to identify  
451 regions where the encoding of effort difference scales with how "effort averse" participants were.  
452 In such regions, a larger difference between chosen and unchosen effort signals would indicate

453 that participants avoid efforts more strongly (**Figure 4B**). Based on prior work, we had a priori  
454 hypotheses about effort preferences being guided by SMA and putamen (e.g., Croxson et al.,  
455 2009; Kurniawan et al., 2010, 2013; Burke et al., 2013). Therefore, we used a small-volume  
456 correction ( $p < 0.05$ ) around previously established coordinates (putamen [ $\pm 26, -8, -2$ ]; SMA [4 -6  
457 58], see (Croxson et al., 2009)). Secondly, in an analogous fashion, we used the behavioural  
458 weights for reward magnitude,  $\beta_M$ , as a covariate on the second level to identify regions where the  
459 encoding of reward magnitude difference scales with how reward-seeking participants are. In  
460 brain regions thus identified, a larger BOLD signal difference between chosen and unchosen  
461 reward signals would imply that participants place a stronger weight on reward maximization in  
462 their choices (**Figure 4A**). Based on prior work, we expected reward magnitude comparisons to  
463 occur in vmPFC (e.g., Kable and Glimcher, 2007; Boorman et al., 2009; Philiastides et al., 2010).  
464 Therefore, we used a small-volume correction ( $p < 0.05$ ) around previously established coordinates  
465 [-6, 48, -8] (Boorman et al., 2009).

466 We further characterized the relationship between participants' effort sensitivity and  
467 BOLD signal changes by asking whether the neural encoding of effort difference relates to the  
468 individual distortions captured in the parameters  $k$  and  $p$  of the effort discounting function. For  
469 each trial, we compared the true effort difference between the chosen and unchosen option with  
470 the modelled subjective effort difference between the chosen and unchosen option. We took the  
471 sum of the absolute error from the best linear fit between these two variables as an index of how  
472 well our initial GLM captured subjective distortions in the evaluation of effort. We used this  
473 measure as an additional regressor for our second level analysis, in addition to  $\beta_E$  (these two  
474 regressors are uncorrelated:  $r = -0.27$ ,  $p = 0.24$ ). This approach had the advantage that it combined  
475 subjective effort distortions driven by both  $p$  and  $k$  into a single parameter relevant for the effort  
476 comparison (correlation of the summed errors with  $k$ :  $r = 0.9646$ ,  $p < 0.001$ ; with  $p$ :  $r = 0.60$ ,  
477  $p = 0.0043$ ).

## 478 Results

479 Human participants performed choices between options with varying rewards and  
480 physical efforts (force grips; **Figure 1A**). Our main aim was to identify areas carrying neural  
481 signatures of value comparison, which are sometimes absent on choices when all decision  
482 variables favour the same choice (Hunt et al., 2012). Therefore, for the majority of decisions,  
483 larger rewards were paired with larger efforts so that reward maximization competed with energy  
484 minimization, and the reward and effort of each option had to be combined into an integrated  
485 subjective value to derive a choice. We first tested whether both the size of reward and the  
486 associated effort of each choice option had an impact on participant's choice behaviour. A  
487 logistic regression showed that participants' choices were indeed guided by the reward magnitude  
488 and effort of both options (left reward:  $t_{20}=-9.71$ , Cohen's  $d=-4.34$ ,  $p=4.28e-08$ ; right reward:  
489  $t_{20}=8.89$ , Cohen's  $d=3.98$ ,  $p=1.44e-07$ ; left effort:  $t_{20}=7.56$ , Cohen's  $d=3.38$ ,  $p=2.79e-06$ ; right  
490 effort:  $t_{20}=-8.37$ , Cohen's  $d=-3.74$ ,  $p=2.79e-06$ ; **Figure 1B**). As expected, larger rewards and  
491 smaller effort costs attracted choices. Overall, participants chose the higher effort option on  $48 \pm$   
492 2% of trials.

493 Next we examined whether effort was weighed up against reward; if this was the case, the  
494 influence of effort (reward) on the participant's choice would become stronger as the reward  
495 (effort) difference between the options becomes smaller. Indeed, effort had a bigger impact on  
496 choice in trials with a small compared to a large reward difference (median split; green panels in  
497 **Figure 1D**; difference in slopes:  $t_{20}=-18.06$ ,  $p=7.51e-14$ ; small reward difference only: slope=  
498  $1.23 \pm 0.11$ ;  $t_{20}=-11.51$ ,  $p=2.82e-10$ ; large reward difference only: slope= $0.26 \pm 0.12$ ,  $t_{20}=-1.95$ ,  
499  $p=0.066$ ). The same was true for reward: its impact on choice behaviour was greater in trials with  
500 a small compared to a large effort difference (blue panels in **Figure 1D**; difference in slopes:  
501  $t_{20}=11.95$ ,  $p=1.46e-10$ ; small effort difference only: slope= $1.65 \pm 0.05$ ,  $t_{20}=36.03$ ,  $p=1.14e-19$ ;

502 large effort difference only: slope=0.38±0.12,  $t_{20}=3.08$ ,  $p=0.0059$ ). This analysis also confirmed  
503 that effort and reward were treated as continuous variables.

504         Given behaviour was guided by the costs as well as the benefits associated with the two  
505 choice options we next asked whether any brain region encoded both effort and reward in a  
506 reference frame consistent with choice. Our main aim was to identify neural signatures of the  
507 choice computation: any brain region comparing the values of the two choice options should be  
508 sensitive to information about both costs and benefits. Recent work using a biophysically realistic  
509 attractor network model (Wang, 2002) suggests that the mass activity of a region computing a  
510 choice should reflect the difference of the values of both choice options (Hunt et al., 2012). In our  
511 task, a region comparing the options should hence encode (1) the inverse difference between  
512 chosen and unchosen efforts, and (2) the (positive) difference between chosen and unchosen  
513 rewards. We therefore computed the formal conjunction of these two contrasts, which is a  
514 conservative test, asking whether any region is significant in both comparisons. This test focussed  
515 on the decision phase, which was separated in time from the motor response (**Figure 1A**). We  
516 identified a cluster of activation in the SMA and in the caudal portion of dorsal anterior cingulate  
517 cortex (dACC), on the border of the anterior and posterior rostral cingulate zones (RCZa, RCZp)  
518 and area 24 (Neubert et al., 2015) (**Figure 2A**;  $p<0.05$  cluster-level FWE-corr; peak coordinate:  
519 [-6, 11, 34],  $t_{1,40}=4.02$ ; SMA peak coordinate: [-9 -7 58],  $t_{1,40}=5.29$ ). No other regions reached  
520 FWE cluster-corrected significance ( $p<0.05$ ). Notably, we did not identify any activations in the  
521 vmPFC, a region commonly identified in reward-related value computations, even at lenient  
522 statistical thresholds ( $p<0.01$ , uncorrected). Replication of this conjunction analysis in FSL,  
523 performed at the suggestion of one reviewer, obtained comparable results, with only dACC and  
524 SMA reaching cluster-level corrected significance (**Figure 2A**, green overlays). The two  
525 difference signals for effort and reward are illustrated for the BOLD time series extracted from  
526 the dACC cluster in **Figure 2B**.



527           These results raise the question of whether and how effort and reward are combined into  
528 an integrated value for each option – a prerequisite for testing whether any brain region encodes  
529 the comparison between subjective option values. While established models exist to examine how  
530 participants compute compound values for uncertain/risky rewards (prospect theory, (Kahneman  
531 and Tversky, 1979; Tversky and Kahneman, 1992)) and delayed rewards (hyperbolic, (Mazur,  
532 1987; Laibson, 1997; Frederick et al., 2002)), it remains unclear how efforts and rewards are  
533 combined into a subjective measure of value. We performed several behavioural experiments to  
534 develop a behavioural model that can formally describe the range of effort discounting  
535 behaviours observed in healthy populations (Klein-Flügge et al., 2015). One key feature of this  
536 model is that it can accommodate cases when increases in effort at lower effort levels have a  
537 comparatively small effect on value, compared to increases in effort at higher effort levels (i.e.,  
538 concave discounting).

539           When we fitted this model to the choices recorded during the scanning session,  
540 participants' behaviour was indeed best captured by an initially concave discounting shape  
541 (initially concave in 16 of 21 participants; **Figure 2C**), consistent with previous work (Klein-  
542 Flügge et al., 2015) and the intuition that effort increases are less noticeable at lower levels of  
543 effort compared to higher levels of effort.

544           Using the individual model fits, we then directly tested for neural signatures consistent  
545 with a value comparison between the subjective values of the two choice options. This is a  
546 slightly less conservative test than the formal conjunction of effort and reward magnitude  
547 difference described above, but we note that this test revealed a highly consistent pattern of  
548 results. We found strong evidence for a network consisting of the SMA (peak: [-9 -7 58],  
549  $t_{1,20}=8.64$ ), caudal portion of dACC (peak: [-3 11 34],  $t_{1,20}=7.1$ ) and bilateral putamen (several  
550 peaks: left [-33 -13 4],  $t_{1,20}=4.96$  and [-33 -10 -2],  $t_{1,20}=5.28$ ; right [33 -1 -2],  $t_{1,20}=4.96$ ) to encode  
551 the (positive) difference in subjective value between the chosen and unchosen options (**Figure**

552 **2D**; all cluster-level FWE-corr;  $p < 0.05$ ). Again, comparable results were obtained using FSL  
553 (green overlays in **Figure 2D**). This network resembled regions previously described for the  
554 evaluation of physical effort, but was clearly distinct from the neural system associated with  
555 decisions about goods involving the vmPFC (Kable and Glimcher, 2007; Boorman et al., 2009;  
556 Fitzgerald et al., 2009; Philiastides et al., 2010; Hunt et al., 2012; Kolling et al., 2012; Clithero  
557 and Rangel, 2014; Strait et al., 2014).

558 To validate our choice of behavioural discounting model, we performed a formal model  
559 comparison and found that the sigmoidal model provided a better explanation of choice behaviour  
560 than (convex) hyperbolic discounting, previously proposed for effort discounting (Prévost et al.,  
561 2010), and two parameter-free descriptions of value ‘reward minus effort’ and ‘reward divided by  
562 effort’ (model exceedance probability:  $x_p=1$ ; mean of posterior distribution:  $mp\_sigm=0.75$ ;  
563  $mp\_hyp=0.05$ ;  $mp\_diff=0.16$ ;  $mp\_div=0.04$ ; **Figure 3A**). On average, the sigmoidal model  
564 correctly predicted  $88 \pm 1\%$  of choices. To examine whether our measure of value derived from  
565 the sigmoidal model also best predicted the BOLD signal, we re-calculated the value difference  
566 contrasts in an analogous way, this time modelling value using a hyperbolic or one of the two  
567 parameter-free models. The resulting whole-brain maps similarly highlighted SMA and dACC  
568 (surviving cluster-level FWE-corr.,  $p < 0.05$  for the hyperbolic and difference models, n.s. for the  
569 quotient model; **Figure 3B**). But importantly, direct statistical comparison showed that the neural  
570 signal in these regions was significantly better explained by the values derived from the  
571 sigmoidal model (cluster-level FWE-corr.,  $p < 0.05$  for the difference and quotient models;  
572 sigmoidal versus hyperbolic: SMA peak  $[-3 -7 61]$ ,  $t_{1,19}=3.95$ ; sigmoidal versus difference: dACC  
573 peak  $[-6,11,34]$ ,  $t_{1,19}=3.28$ ; SMA peak  $[-6 -7 58]$ ,  $t_{1,19}=5.33$ ; sigmoidal versus quotient: dACC  
574 peak  $[-6,11,34]$ ,  $t_{1,19}=4.77$ ; SMA peak  $[-6 -7 61]$ ,  $t_{1,19}=6.72$ ; **Figure 3C**). This suggests that the  
575 BOLD signal aligns with the subjective experience of effort-discounted value which was best  
576 captured using the sigmoidal model.

577 A crucial question is whether the observed value difference signal bears any behavioural  
578 relevance for choice, rather than potentially being a mere bi-product of a choice computation  
579 elsewhere. In the former case, one would expect that the encoding of subjective value difference  
580 relates to the strength, or ‘weight’, with which subjective value difference influenced behaviour  
581 across participants (Jocham et al., 2012; Kolling et al., 2012; Khamassi et al., 2015). Such a  
582 behavioural weight was derived for each participant using a logistic regression on the normalized  
583 model-derived subjective values. The resulting parameter estimate is the same as the inverse  
584 softmax temperature or precision and reflects how consistently participants choose the  
585 subjectively more valuable option (see Methods:  $\beta_V$  in equation 2). The only region that was  
586 significant in this second-level test and also encoded value difference at the first level was the  
587 dACC (**Figure 2F**; cluster-level FWE-corr.,  $p < 0.05$ ; peak [-3 11 31],  $t_{1,19} = 3.71$ ). In other words,  
588 dACC encoded value difference on average across the group, and participants who exhibited a  
589 larger BOLD value difference signal in the dACC were also more consistent in choosing the  
590 subjectively better option (larger  $\beta_V$ ); this relationship is illustrated in **Figure 2F**.

591 To further probe whether the identified network of regions evaluates the choice options in  
592 a subjective manner, we examined the relationship between the subjective ‘distortion’ of effort  
593 described by the parameters  $k$  and  $p$  of the individual effort discount function, and the BOLD  
594 signal related to the effort difference across participants. We calculated a measure to describe  
595 how much the true effort difference deviated from the subjectively experienced effort difference  
596 overall across trials. This ‘distortion’ regressor correlated with  $k$  ( $r = 0.9646$ ,  $p < 0.001$ ) and  $p$   
597 ( $r = 0.60$ ,  $p = 0.0043$ ), but not  $\beta_E$  ( $r = -0.27$ ,  $p = 0.24$ ), and was used as a second-level covariate for the  
598 effort difference contrast. GLM1 contained the efforts shown on the screen and thus should have  
599 captured the subjectively experienced effort better in participants who showed smaller effort  
600 distortions (i.e., with discounting closer to linear). Thus, in regions related to the comparison of  
601 subjective effort or effort-integrated value, we expected participants with less effort distortions to  
602 show a stronger negative effort difference signal. Indeed, we found such a positive second-level

603 correlation with the BOLD signal in dACC and SMA, supporting the notion that effort difference  
604 is encoded in these regions in the way it subjectively influences the choice (**Figure 2G**, cluster-  
605 level FWE-corr.,  $p < 0.05$ ; dACC peak [-3 14 31],  $t_{1,19} = 5.01$ , global maxima; SMA peak [-6, -7,  
606 61],  $t_{1,19} = 4.08$ ).

607 ACC has access to information from motor structures (Selemon and Goldman-Rakic,  
608 1985; Dum and Strick, 1991; Morecraft and Van Hoesen, 1992, 1998; Kunishio and Haber, 1994;  
609 Beckmann et al., 2009) previously linked to evaluating effort (Croxson et al., 2009; Kurniawan et  
610 al., 2010, 2013; Burke et al., 2013), and prefrontal regions known to be involved in reward  
611 processing, such as the vmPFC and OFC (Padoa-Schioppa and Assad, 2006; Kennerley and  
612 Wallis, 2009; Levy and Glimcher, 2011; Rudebeck and Murray, 2011; Klein-Flügge et al., 2013;  
613 Chau et al., 2015; Stalnaker et al., 2015). We thus reasoned that the ACC may be a key node for  
614 the type of effort-based choice assessed in the present task. To further test this hypothesis, we  
615 sought to identify regions that mediate between reward maximisation versus effort minimization  
616 in our task.

617 To this end, we first extracted two separate behavioural weights reflecting participants'  
618 tendency to seek reward and avoid effort. These behavioural parameters were derived from a  
619 logistic regression with two regressors explaining how much choices were guided by the  
620 difference in reward magnitude and the difference in effort level between options (see Methods:  
621  $\beta_M$  and  $\beta_E$  in equation 3). This is distinct from using just one regressor for the combined  
622 subjective value difference as done above ( $\beta_V$ ). Across participants, we then first identified brain  
623 regions where the encoding of chosen versus unchosen reward magnitude correlated with the  
624 weight,  $\beta_M$ , with which choices were influenced by the difference in *reward* between the chosen  
625 and unchosen option. Secondly, we performed the equivalent test for effort, i.e. we identified  
626 regions where the neural encoding of chosen versus unchosen effort correlated with the weight, -  
627  $\beta_E$ , with which behaviour was guided by the difference in *effort* between the chosen and unchosen

628 option. The two tests revealed two distinct networks of regions. First, the vmPFC encoded reward  
629 magnitude difference across subjects as a function of how much participants' choices were driven  
630 by the difference in reward between the options (SVC FWE-corr cluster-level  $p=0.037$ ; peak  $[-6$   
631  $44 -8]$ ,  $t_{1,19}=2.87$ ; **Figure 4A**). Unlike in many other tasks (Kable and Glimcher, 2007; Boorman  
632 et al., 2009; Fitzgerald et al., 2009; Philiastides et al., 2010; Hunt et al., 2012; Kolling et al.,  
633 2012; Clithero and Rangel, 2014; Strait et al., 2014), the vmPFC BOLD signal did not correlate  
634 with chosen reward or reward difference on average in the group. However, reward difference  
635 signals were on average positive for participants whose choices were more strongly driven by  
636 reward magnitudes (median split; **Figure 4A**). At the whole-brain level, the correlation of  
637 behavioural reward-weight,  $\beta_M$ , and BOLD reward difference encoding did not reveal any  
638 activations using our FWE cluster-level corrected criterion of  $p<0.05$ . Using a lenient exploratory  
639 threshold ( $p=0.01$ , uncorr), we identified a small number of other regions including the posterior  
640 cingulate cortex (PCC) bilaterally and visual cortex (**Figure 4A**), but crucially no clusters in  
641 motor, supplementary motor or striatal regions.

642 By contrast, a network of motor regions including SMA and putamen encoded effort  
643 difference as a function of the individual behavioural effort weight  $-\beta_E$  (**Figure 4B**; SVC FWE-  
644 corr cluster-level SMA:  $p=0.048$ , peak  $[3 -7 58]$ ,  $t_{1,19}=2.59$ ; left putamen:  $p=0.035$ , peak  $[-27 -4 -$   
645  $5]$ ,  $t_{1,19}=3.39$ ; right putamen no supra-threshold voxels). In other words, these regions encoded the  
646 difference in effort between the chosen and unchosen options more strongly in participants whose  
647 choices were negatively influenced by large effort differences, i.e. participants who were more  
648 sensitive to effort costs. Using a whole-brain FWE cluster-level-corrected threshold ( $p<0.05$ ), no  
649 regions were detected in this contrast. At an exploratory threshold ( $p=0.01$ , uncorr), this contrast  
650 also highlighted regions in the brainstem, primary motor cortex, thalamus and dorsal striatum  
651 (**Figure 4B**), and thus regions previously implicated in evaluating motor costs and in recruiting  
652 resources in anticipation of effort (Croxson et al., 2009; Burke et al., 2013; Kurniawan et al.,

653 2013), but clearly distinct from the vmPFC/PCC network identified in the equivalent test for  
654 reward above.

655 Taken together, our data thus show that two distinct networks centred on vmPFC versus  
656 SMA/putamen encode the reward versus effort difference as a function of how much these  
657 variables influence the final choice. Yet only the caudal portion of dACC encodes the difference  
658 in overall subjective value as a function of how much overall value influences choice. This region  
659 in dACC could therefore be a potential mediator between reward maximization and effort  
660 minimization which appear to occur in separate neural circuits.

#### 661 *Functionally distinct sub-regions of medial PFC*

662 For completeness, we also tested if any areas encode an opposite value difference signal  
663 (i.e., the inverse of the conjunction analysis and of the subjective value difference contrast  
664 performed above), reflecting the evidence *against* the chosen option and thus one notion of  
665 decision difficulty. This did not reveal any regions at our conservative (cluster-level FWE-  
666 corrected) threshold in either test. At a more lenient exploratory threshold ( $p=0.01$  uncorr), a  
667 single common cluster in medial PFC (pre-SMA/area 9) was identified (**Figure 5**), in agreement  
668 with previous reports of negative value difference signals in this region (Wunderlich et al., 2009;  
669 Hare et al., 2011). Importantly, the location of this activation was clearly distinct from the caudal  
670 dACC region found to encode a positive value difference (**Figure 2**). Here, by contrast, value  
671 difference signals did not correlate with the strength with which subjective value difference  
672 influenced behaviour across participants ( $\beta_V$ ; no supra-threshold voxels at  $p=0.01$  uncorr.),  
673 suggesting this region's functions during choice are separate from those that bias behaviour.

## 674 **Discussion**

675           Choices requiring the consideration of motor costs are ubiquitous in everyday life. Unlike  
676 other types of choices they require knowledge of the current state of the body and its available  
677 energy resources, to weight physical costs against potential benefits. How this trade-off might be  
678 implemented neurally remains largely unknown.

679           Here, we identified a region in the caudal part of dorsal anterior cingulate cortex (dACC)  
680 as the key brain region that carried the requisite signatures for effort-based choice: dACC  
681 represented the costs and benefits of the chosen relative to the alternative option, integrated effort  
682 and reward into a combined subjective value signal, computed the subjective value difference  
683 between the chosen relative to the alternative option, and activity here correlated with the degree  
684 to which participants' choices were driven by value.

### 685           *ACC integrates effort and reward information*

686           Work from several lines of research suggests ACC may be a key region for performing  
687 cost-benefit integration for effort-based choice. For example, lesions to ACC (but not OFC) result  
688 in fewer choices of a high effort/high reward compared to a low effort/low reward option: yet  
689 such animals still choose larger reward options when effort costs for both options are equated,  
690 implying ACC is not essential when decisions can be solved only by reward (Walton et al., 2003,  
691 2009; Schweimer and Hauber, 2005; Rudebeck et al., 2006; Floresco and Ghods-Sharifi, 2007).  
692 BOLD responses in human ACC reflect the integrated value of effort-based options in the  
693 absence of choice (Croxson et al., 2009). Further, single neuron recordings from ACC encode  
694 information about both effort and reward (Shidara and Richmond, 2002; Kennerley et al., 2009,  
695 2011), and integrate costs and benefits into a value signal (Hillman and Bilkey, 2010; Hosokawa

696 et al., 2013; Hunt et al., 2015). ACC thus appears to have a critical role in integrating effort and  
697 reward information to derive the subjective value of performing a particular action.

698 *ACC encodes a choice comparison signal*

699 However, from the aforementioned work it remained unclear whether cost-benefit values  
700 of different choice options are actually *compared* in ACC, or whether reward and effort may be  
701 compared in separate neural structures and the competition resolved between areas. When one  
702 choice option is kept constant, the value of the changing option correlates perfectly with the value  
703 difference between the options (Kurniawan et al., 2010; Prévost et al., 2010; Bonnelle et al.,  
704 2016), which precludes distinguishing between valuation and value comparison processes. This is  
705 similarly true when only one option is offered and accepted/rejected (Bonnelle et al., 2016). We  
706 here varied both options' values from trial to trial, which allowed us to identify a choice  
707 *comparison* signal in the ACC, and thus the essential neural signature implicating this area in  
708 decision making. Firstly we show a region in the caudal portion of dACC encodes separate  
709 difference signals for effort and reward. The direction of these difference signals aligns with their  
710 respective effect on value, with effort decreasing and reward increasing an option's overall value.  
711 Secondly, we demonstrate a comparison signal between integrated option values. We used a  
712 novel behavioural model (Klein-Flügge et al., 2015) to characterize participants' individual  
713 tendency to discount reward given the level of motor costs. Using the resultant model-derived  
714 subjective values, we identified the dACC as a region encoding a combined value difference  
715 signal. Indeed, our model provided a better characterization of the BOLD signal than other  
716 models of effort discounting, and dACC activity was related to individuals' 'distortions' of effort.  
717 This resolves an important question showing that effort and reward information are indeed  
718 brought together within a single region to inform choice.

719 Finally, this value comparison signal also varied as a function of how much value  
720 influenced choices across participants. This result further strengthens the idea that the dACC



721 plays a crucial role in guiding choice, rather than merely representing effort or reward  
722 information. In our task, no other region exhibited similar dynamics even at lenient thresholds.

### 723 *Influences from ‘effort’ and ‘reward’ circuits*

724 Nevertheless, an important question remains: do the regions that preferentially encode  
725 /reward or effort have any influence on choice? To examine this question, we looked for regions  
726 that explain participants’ tendency to avoid effort, or to seek reward. This analysis revealed two  
727 distinct circuits. Whereas signals in vmPFC reflected the relative benefits as a function of how  
728 reward-driven participants’ choices were, a network more commonly linked to action selection  
729 and effort evaluation (Croxson et al., 2009; Kurniawan et al., 2010, 2013; Prévost et al., 2010;  
730 Burke et al., 2013; Bonnelle et al., 2016) – including SMA and putamen – encoded relative effort  
731 as a function of how much participants tried to avoid energy expenditure. It will be of interest to  
732 examine in future work how these circuits interact, and how different modulatory systems  
733 contribute to this interplay (see e.g., Varazzani et al., 2015). This question should be extended to  
734 situations when different costs coincide or different strategies compete (see Burke et al., 2013 for  
735 one recent example), or when information about effort and reward has to be learnt (Skvortsova et  
736 al., 2014; Scholl et al., 2015).

### 737 *Converging evidence for multiple decision circuits*

738 Our results contribute to an emerging literature demonstrating the existence of multiple  
739 decision systems in the brain which are flexibly recruited based on the type of decision  
740 (Rushworth et al., 2012). One well-studied system concerns choices where costs are directly tied  
741 to outcomes (e.g., risk, delay). During this type of choice, vmPFC encodes the difference between  
742 the chosen and unchosen options’ cost-benefit value (Kable and Glimcher, 2007; Boorman et al.,  
743 2009; Philiastides et al., 2010; Hunt et al., 2012; Kolling et al., 2012), consistent with the  
744 decision impairments observed after vmPFC lesions (Noonan et al., 2010; Camille et al., 2011a,

2011c). Other types of choices, however, rely on other networks (Kolling et al., 2012; Hunt et al., 2014; Wan et al., 2015). In the present study, decisions required the integration of motor costs and we show that for this dACC, rather than vmPFC, plays a more central role. VmPFC did not encode overall value or the difference in value between the options in our task; in our hands, vmPFC evidenced no information about effort costs, consistent with previous proposals (Prévost et al., 2010; Skvortsova et al., 2014).

#### *Functionally dissociable anatomical sub-regions of mPFC*

The location in the dACC identified here is distinct from a more anterior and dorsal region in medial frontal cortex (in or near pre-SMA) where BOLD encodes the opposite signal: a negative value difference (Wunderlich et al., 2009; Hare et al., 2011). It is also more posterior than a dACC region involved in foraging choices (Kolling et al., 2012). The cluster of activation identified here extends from the cingulate gyrus dorsally into the lower bank of the cingulate sulcus, and it is sometimes also referred to it as midcingulate cortex (MCC; Procyk et al., 2016) or rostral cingulate zone (Ridderinkhof et al., 2004). According to a recent connectivity-based parcellation, our activation is on the border of areas RCZa (34%), RCZp (33%) and area 24 (48%) (Neubert et al., 2015). While it shares some voxels with the motor cingulate regions in humans (Amiez and Petrides, 2014), most parts of our cluster are more ventral and located in the gyral portion of ACC (see also Kolling et al., 2016 for a discussion of functionally dissociable activations in ACC).

#### *Relevance for disorders of motivation*

Our findings in the dACC speak to an important line of research showing deficits in effort-based decision making in a number of disorders including depression, negative symptom schizophrenia and apathy (Levy and Dubois, 2006; Cléry-Melin et al., 2011; Treadway et al., 2012, 2015; Fervaha et al., 2013; Gold et al., 2013; Hartmann et al., 2014; Pizzagalli, 2014; Yang

769 et al., 2014; Bonnelle et al., 2015). Patients with these disorders often show a reduced ability to  
770 initiate effortful actions to obtain reward. Crucially, they also exhibit abnormalities in ACC and  
771 basal-ganglia circuits, as well as other regions processing information about the autonomic state,  
772 including the amygdala and some brainstem structures (Drevets et al., 1997; Botteron et al., 2002;  
773 Levy and Dubois, 2006). Furthermore, individuals with greater behavioural apathy scores show  
774 enhanced recruitment of precisely the circuits implicated in the present study, including SMA and  
775 cingulate cortex, when deciding to initiate effortful behaviour (Bonnelle et al., 2016). This is  
776 interesting because apathy correlates with increased effort sensitivity ( $\beta_E$ ; Bonnelle et al., 2016),  
777 and we found that individuals with increased effort sensitivity showed enhanced recruitment of  
778 SMA and brainstem regions for encoding the effort difference (Fig 3B). In other words, when  
779 committing to a larger (relative) effort, these circuits were more active in people who were more  
780 sensitive to effort. As discussed in Bonnelle et al. (2016), we cannot infer cause and effect but it  
781 is possible that the neural balance between activations in reward and effort systems might be  
782 different in individuals with greater sensitivity to efforts (such as apathetic individuals). This may  
783 be why these people avoid choosing effortful options more often than others. It also provides a  
784 possible connection between the network's specific role in effort-based choice and its functional  
785 contribution to everyday life behaviours.

## 786 **References**

- 787 Amiez C, Petrides M (2014) Neuroimaging evidence of the anatomo-functional organization of the  
788 human cingulate motor areas. *Cereb Cortex N Y N* 1991 24:563–578.
- 789 Andersson JL, Hutton C, Ashburner J, Turner R, Friston K (2001) Modeling geometric deformations in  
790 EPI time series. *NeuroImage* 13:903–919.
- 791 Beckmann M, Johansen-Berg H, Rushworth MFS (2009) Connectivity-Based Parcellation of Human  
792 Cingulate Cortex and Its Relation to Functional Specialization. *J Neurosci* 29:1175–1190.
- 793 Birn RM, Diamond JB, Smith MA, Bandettini PA (2006) Separating respiratory-variation-related  
794 fluctuations from neuronal-activity-related fluctuations in fMRI. *NeuroImage* 31:1536–1548.
- 795 Bonnelle V, Manohar S, Behrens T, Husain M (2016) Individual Differences in Premotor Brain  
796 Systems Underlie Behavioral Apathy. *Cereb Cortex N Y NY* 26:807–819.
- 797 Bonnelle V, Veromann K-R, Burnett Heyes S, Lo Sterzo E, Manohar S, Husain M (2015)  
798 Characterization of reward and effort mechanisms in apathy. *J Physiol Paris* 109:16–26.
- 799 Boorman ED, Behrens TEJ, Woolrich MW, Rushworth MFS (2009) How green is the grass on the  
800 other side? Frontopolar cortex and the evidence in favor of alternative courses of action.  
801 *Neuron* 62:733–743.
- 802 Botteron KN, Raichle ME, Drevets WC, Heath AC, Todd RD (2002) Volumetric reduction in left  
803 subgenual prefrontal cortex in early onset depression. *Biol Psychiatry* 51:342–344.
- 804 Burke CJ, Brünger C, Kahnt T, Park SQ, Tobler PN (2013) Neural Integration of Risk and Effort Costs by  
805 the Frontal Pole: Only upon Request. *J Neurosci Off J Soc Neurosci* 33:1706–1713.
- 806 Camille N, Griffiths CA, Vo K, Fellows LK, Kable JW (2011a) Ventromedial Frontal Lobe Damage  
807 Disrupts Value Maximization in Humans. *J Neurosci* 31:7527–7532.
- 808 Camille N, Tsuchida A, Fellows LK (2011b) Double dissociation of stimulus-value and action-value  
809 learning in humans with orbitofrontal or anterior cingulate cortex damage. *J Neurosci Off J*  
810 *Soc Neurosci* 31:15048–15052.
- 811 Camille N, Tsuchida A, Fellows LK (2011c) Double dissociation of stimulus-value and action-value  
812 learning in humans with orbitofrontal or anterior cingulate cortex damage. *J Neurosci Off J*  
813 *Soc Neurosci* 31:15048–15052.
- 814 Chau BKH, Sallet J, Papageorgiou GK, Noonan MP, Bell AH, Walton ME, Rushworth MFS (2015)  
815 Contrasting Roles for Orbitofrontal Cortex and Amygdala in Credit Assignment and Learning  
816 in Macaques. *Neuron* 87:1106–1118.
- 817 Cléry-Melin M-L, Schmidt L, Lafargue G, Baup N, Fossati P, Pessiglione M (2011) Why don't you try  
818 harder? An investigation of effort production in major depression. *PloS One* 6:e23178.
- 819 Clithero JA, Rangel A (2014) Informatic parcellation of the network involved in the computation of  
820 subjective value. *Soc Cogn Affect Neurosci* 9:1289–1302.

- 821 Croxson PL, Walton ME, O'Reilly JX, Behrens TEJ, Rushworth MFS (2009) Effort-based cost-benefit  
822 valuation and the human brain. *J Neurosci Off J Soc Neurosci* 29:4531–4541.
- 823 Drevets WC, Price JL, Simpson JR Jr, Todd RD, Reich T, Vannier M, Raichle ME (1997) Subgenual  
824 prefrontal cortex abnormalities in mood disorders. *Nature* 386:824–827.
- 825 Dum RP, Strick PL (1991) The origin of corticospinal projections from the premotor areas in the  
826 frontal lobe. *J Neurosci Off J Soc Neurosci* 11:667–689.
- 827 Eklund A, Nichols T, Knutsson H (2015) Can parametric statistical methods be trusted for fMRI based  
828 group studies? ArXiv151101863 Math Stat Available at: <http://arxiv.org/abs/1511.01863>  
829 [Accessed May 26, 2016].
- 830 Fervaha G, Foussias G, Agid O, Remington G (2013) Neural substrates underlying effort computation  
831 in schizophrenia. *Neurosci Biobehav Rev* 37:2649–2665.
- 832 Fitzgerald THB, Seymour B, Dolan RJ (2009) The role of human orbitofrontal cortex in value  
833 comparison for incommensurable objects. *J Neurosci Off J Soc Neurosci* 29:8388–8395.
- 834 Floresco SB, Ghods-Sharifi S (2007) Amygdala-prefrontal cortical circuitry regulates effort-based  
835 decision making. *Cereb Cortex N Y N 1991* 17:251–260.
- 836 Frederick S, Loewenstein G, O'Donoghue T (2002) Time Discounting and Time Preference: A Critical  
837 Review. *J Econ Lit* 40:351–401.
- 838 Friston K, Mattout J, Trujillo-Barreto N, Ashburner J, Penny W (2007) Variational free energy and the  
839 Laplace approximation. *NeuroImage* 34:220–234.
- 840 Glover GH, Li T-Q, Ress D (2000) Image-based method for retrospective correction of physiological  
841 motion effects in fMRI: RETROICOR. *Magn Reson Med* 44:162–167.
- 842 Gold JM, Strauss GP, Waltz JA, Robinson BM, Brown JK, Frank MJ (2013) Negative Symptoms of  
843 Schizophrenia Are Associated with Abnormal Effort-Cost Computations. *Biol Psychiatry*.
- 844 Hare TA, Schultz W, Camerer CF, O'Doherty JP, Rangel A (2011) Transformation of stimulus value  
845 signals into motor commands during simple choice. *Proc Natl Acad Sci U S A* 108:18120–  
846 18125.
- 847 Hartmann MN, Hager OM, Reimann AV, Chumbley JR, Kirschner M, Seifritz E, Tobler PN, Kaiser S  
848 (2014) Apathy But Not Diminished Expression in Schizophrenia Is Associated With  
849 Discounting of Monetary Rewards by Physical Effort. *Schizophr Bull*.
- 850 Hayden BY, Platt ML (2010) Neurons in anterior cingulate cortex multiplex information about reward  
851 and action. *J Neurosci Off J Soc Neurosci* 30:3339–3346.
- 852 Hillman KL, Bilkey DK (2010) Neurons in the rat anterior cingulate cortex dynamically encode cost-  
853 benefit in a spatial decision-making task. *J Neurosci Off J Soc Neurosci* 30:7705–7713.
- 854 Hosokawa T, Kennerley SW, Sloan J, Wallis JD (2013) Single-neuron mechanisms underlying cost-  
855 benefit analysis in frontal cortex. *J Neurosci Off J Soc Neurosci* 33:17385–17397.
- 856 Hunt LT, Behrens TE, Hosokawa T, Wallis JD, Kennerley SW (2015) Capturing the temporal evolution  
857 of choice across prefrontal cortex. *eLife*:e11945.

- 858 Hunt LT, Dolan RJ, Behrens TEJ (2014) Hierarchical competitions subserving multi-attribute choice.  
859 Nat Neurosci 17:1613–1622.
- 860 Hunt LT, Kolling N, Soltani A, Woolrich MW, Rushworth MFS, Behrens TEJ (2012) Mechanisms  
861 underlying cortical activity during value-guided choice. Nat Neurosci 15:470–476.
- 862 Hutton C, Josephs O, Stadler J, Featherstone E, Reid A, Speck O, Bernarding J, Weiskopf N (2011) The  
863 impact of physiological noise correction on fMRI at 7T. NeuroImage 57:101–112.
- 864 Jocham G, Hunt LT, Near J, Behrens TEJ (2012) A mechanism for value-guided choice based on the  
865 excitation-inhibition balance in prefrontal cortex. Nat Neurosci 15:960–961.
- 866 Kable JW, Glimcher PW (2007) The neural correlates of subjective value during intertemporal choice.  
867 Nat Neurosci 10:1625–1633.
- 868 Kahneman D, Tversky A (1979) Prospect theory - analysis of decision under risk. Econometrica  
869 47:263–291.
- 870 Kennerley SW, Behrens TEJ, Wallis JD (2011) Double dissociation of value computations in  
871 orbitofrontal and anterior cingulate neurons. Nat Neurosci 14:1581–1589.
- 872 Kennerley SW, Dahmubed AF, Lara AH, Wallis JD (2009) Neurons in the frontal lobe encode the value  
873 of multiple decision variables. J Cogn Neurosci 21:1162–1178.
- 874 Kennerley SW, Wallis JD (2009) Evaluating choices by single neurons in the frontal lobe: outcome  
875 value encoded across multiple decision variables. Eur J Neurosci 29:2061–2073.
- 876 Kennerley SW, Walton ME, Behrens TEJ, Buckley MJ, Rushworth MFS (2006) Optimal decision  
877 making and the anterior cingulate cortex. Nat Neurosci 9:940–947.
- 878 Khamassi M, Quilodran R, Enel P, Dominey PF, Procyk E (2015) Behavioral Regulation and the  
879 Modulation of Information Coding in the Lateral Prefrontal and Cingulate Cortex. Cereb  
880 Cortex N Y N 1991 25:3197–3218.
- 881 Klein-Flügge MC, Barron HC, Brodersen KH, Dolan RJ, Behrens TEJ (2013) Segregated Encoding of  
882 Reward-Identity and Stimulus-Reward Associations in Human Orbitofrontal Cortex. J  
883 Neurosci Off J Soc Neurosci 33:3202–3211.
- 884 Klein-Flügge MC, Kennerley SW, Saraiva AC, Penny WD, Bestmann S (2015) Behavioral modeling of  
885 human choices reveals dissociable effects of physical effort and temporal delay on reward  
886 devaluation. PLoS Comput Biol 11:e1004116.
- 887 Kolling N, Behrens T, Wittmann M, Rushworth M (2016) Multiple signals in anterior cingulate cortex.  
888 Curr Opin Neurobiol 37:36–43.
- 889 Kolling N, Behrens TEJ, Mars RB, Rushworth MFS (2012) Neural Mechanisms of Foraging. Science  
890 336:95–98.
- 891 Kunishio K, Haber SN (1994) Primate cingulo-striatal projection: Limbic striatal versus sensorimotor  
892 striatal input. J Comp Neurol 350:337–356.
- 893 Kurniawan IT, Guitart-Masip M, Dayan P, Dolan RJ (2013) Effort and valuation in the brain: the  
894 effects of anticipation and execution. J Neurosci Off J Soc Neurosci 33:6160–6169.

- 895 Kurniawan IT, Seymour B, Talmi D, Yoshida W, Chater N, Dolan RJ (2010) Choosing to make an effort:  
896 the role of striatum in signaling physical effort of a chosen action. *J Neurophysiol* 104:313–  
897 321.
- 898 Laibson D (1997) Golden Eggs and Hyperbolic Discounting. *Q J Econ* 112:443–478.
- 899 Levy DJ, Glimcher PW (2011) Comparing apples and oranges: using reward-specific and reward-  
900 general subjective value representation in the brain. *J Neurosci Off J Soc Neurosci* 31:14693–  
901 14707.
- 902 Levy R, Dubois B (2006) Apathy and the Functional Anatomy of the Prefrontal Cortex–Basal Ganglia  
903 Circuits. *Cereb Cortex* 16:916–928.
- 904 Luk C-H, Wallis JD (2009) Dynamic encoding of responses and outcomes by neurons in medial  
905 prefrontal cortex. *J Neurosci Off J Soc Neurosci* 29:7526–7539.
- 906 Matsumoto K, Suzuki W, Tanaka K (2003) Neuronal correlates of goal-based motor selection in the  
907 prefrontal cortex. *Science* 301:229–232.
- 908 Mazur J (1987) An adjusting procedure for studying delayed reinforcement. In: *Quantitative analyses*  
909 *of behavior: Vol. 5. The effect of delay and of intervening events on re- reinforcement value*  
910 (Commons M, Mazur J, Nevin J, Rachlin H, eds). Erlbaum.
- 911 Morecraft RJ, Van Hoesen GW (1992) Cingulate input to the primary and supplementary motor  
912 cortices in the rhesus monkey: evidence for somatotopy in areas 24c and 23c. *J Comp Neurol*  
913 322:471–489.
- 914 Morecraft RJ, Van Hoesen GW (1998) Convergence of limbic input to the cingulate motor cortex in  
915 the rhesus monkey. *Brain Res Bull* 45:209–232.
- 916 Neubert F-X, Mars RB, Sallet J, Rushworth MFS (2015) Connectivity reveals relationship of brain  
917 areas for reward-guided learning and decision making in human and monkey frontal cortex.  
918 *Proc Natl Acad Sci U S A* 112:E2695-2704.
- 919 Noonan MP, Walton ME, Behrens TEJ, Sallet J, Buckley MJ, Rushworth MFS (2010) Separate value  
920 comparison and learning mechanisms in macaque medial and lateral orbitofrontal cortex.  
921 *Proc Natl Acad Sci* 107:20547–20552.
- 922 Padoa-Schioppa C, Assad JA (2006) Neurons in the orbitofrontal cortex encode economic value.  
923 *Nature* 441:223–226.
- 924 Pastor-Bernier A, Cisek P (2011) Neural correlates of biased competition in premotor cortex. *J*  
925 *Neurosci Off J Soc Neurosci* 31:7083–7088.
- 926 Penny W, Kiebel S, Friston K (2003) Variational Bayesian inference for fMRI time series. *NeuroImage*  
927 19:727–741.
- 928 Philiastides MG, Biele G, Heekeren HR (2010) A mechanistic account of value computation in the  
929 human brain. *Proc Natl Acad Sci U S A* 107:9430–9435.
- 930 Pizzagalli DA (2014) Depression, stress, and anhedonia: toward a synthesis and integrated model.  
931 *Annu Rev Clin Psychol* 10:393–423.



- 932 Prévost C, Pessiglione M, Météreau E, Cléry-Melin M-L, Dreher J-C (2010) Separate valuation  
933 subsystems for delay and effort decision costs. *J Neurosci Off J Soc Neurosci* 30:14080–  
934 14090.
- 935 Procyk E, Wilson CRE, Stoll FM, Faraut MCM, Petrides M, Amiez C (2016) Midcingulate Motor Map  
936 and Feedback Detection: Converging Data from Humans and Monkeys. *Cereb Cortex N Y N*  
937 1991 26:467–476.
- 938 Rangel A, Hare T (2010) Neural computations associated with goal-directed choice. *Curr Opin*  
939 *Neurobiol* 20:262–270.
- 940 Ridderinkhof KR, Ullsperger M, Crone EA, Nieuwenhuis S (2004) The role of the medial frontal cortex  
941 in cognitive control. *Science* 306:443–447.
- 942 Rudebeck PH, Behrens TE, Kennerley SW, Baxter MG, Buckley MJ, Walton ME, Rushworth MFS  
943 (2008) Frontal cortex subregions play distinct roles in choices between actions and stimuli. *J*  
944 *Neurosci Off J Soc Neurosci* 28:13775–13785.
- 945 Rudebeck PH, Murray EA (2011) Balkanizing the primate orbitofrontal cortex: distinct subregions for  
946 comparing and contrasting values. *Ann N Y Acad Sci* 1239:1–13.
- 947 Rudebeck PH, Walton ME, Smyth AN, Bannerman DM, Rushworth MFS (2006) Separate neural  
948 pathways process different decision costs. *Nat Neurosci* 9:1161–1168.
- 949 Rushworth MF, Kolling N, Sallet J, Mars RB (2012) Valuation and decision-making in frontal cortex:  
950 one or many serial or parallel systems? *Curr Opin Neurobiol* Available at:  
951 <http://www.ncbi.nlm.nih.gov/pubmed/22572389> [Accessed May 27, 2012].
- 952 Scholl J, Kolling N, Nelissen N, Wittmann MK, Harmer CJ, Rushworth MFS (2015) The Good, the Bad,  
953 and the Irrelevant: Neural Mechanisms of Learning Real and Hypothetical Rewards and  
954 Effort. *J Neurosci Off J Soc Neurosci* 35:11233–11251.
- 955 Schweimer J, Hauber W (2005) Involvement of the rat anterior cingulate cortex in control of  
956 instrumental responses guided by reward expectancy. *Learn Mem Cold Spring Harb N*  
957 12:334–342.
- 958 Selemon LD, Goldman-Rakic PS (1985) Longitudinal topography and interdigitation of corticostriatal  
959 projections in the rhesus monkey. *J Neurosci* 5:776–794.
- 960 Shidara M, Richmond BJ (2002) Anterior cingulate: single neuronal signals related to degree of  
961 reward expectancy. *Science* 296:1709–1711.
- 962 Skvortsova V, Palminteri S, Pessiglione M (2014) Learning to minimize efforts versus maximizing  
963 rewards: computational principles and neural correlates. *J Neurosci Off J Soc Neurosci*  
964 34:15621–15630.
- 965 Stalnaker TA, Cooch NK, Schoenbaum G (2015) What the orbitofrontal cortex does not do. *Nat*  
966 *Neurosci* 18:620–627.
- 967 Strait CE, Blanchard TC, Hayden BY (2014) Reward value comparison via mutual inhibition in  
968 ventromedial prefrontal cortex. *Neuron* 82:1357–1366.



- 969 Treadway MT, Bossaller NA, Shelton RC, Zald DH (2012) Effort-based decision-making in major  
970 depressive disorder: a translational model of motivational anhedonia. *J Abnorm Psychol*  
971 121:553–558.
- 972 Treadway MT, Peterman JS, Zald DH, Park S (2015) Impaired effort allocation in patients with  
973 schizophrenia. *Schizophr Res* 161:382–385.
- 974 Tversky A, Kahneman D (1992) Advances in Prospect Theory: Cumulative Representation of  
975 Uncertainty. *J Risk Uncertain* 5:297–323.
- 976 Varazzani C, San-Galli A, Gilardeau S, Bouret S (2015) Noradrenaline and dopamine neurons in the  
977 reward/effort trade-off: a direct electrophysiological comparison in behaving monkeys. *J*  
978 *Neurosci Off J Soc Neurosci* 35:7866–7877.
- 979 Walton ME, Bannerman DM, Alterescu K, Rushworth MFS (2003) Functional specialization within  
980 medial frontal cortex of the anterior cingulate for evaluating effort-related decisions. *J*  
981 *Neurosci Off J Soc Neurosci* 23:6475–6479.
- 982 Walton ME, Groves J, Jennings KA, Croxson PL, Sharp T, Rushworth MFS, Bannerman DM (2009)  
983 Comparing the role of the anterior cingulate cortex and 6-hydroxydopamine nucleus  
984 accumbens lesions on operant effort-based decision making. *Eur J Neurosci* 29:1678–1691.
- 985 Walton ME, Kennerley SW, Bannerman DM, Phillips PEM, Rushworth MFS (2006) Weighing up the  
986 benefits of work: behavioral and neural analyses of effort-related decision making. *Neural*  
987 *Netw Off J Int Neural Netw Soc* 19:1302–1314.
- 988 Wan X, Cheng K, Tanaka K (2015) Neural encoding of opposing strategy values in anterior and  
989 posterior cingulate cortex. *Nat Neurosci* 18:752–759.
- 990 Wang X-J (2002) Probabilistic decision making by slow reverberation in cortical circuits. *Neuron*  
991 36:955–968.
- 992 Ward NS, Frackowiak RSJ (2003) Age-related changes in the neural correlates of motor performance.  
993 *Brain* 126:873–888.
- 994 Weiskopf N, Hutton C, Josephs O, Deichmann R (2006) Optimal EPI parameters for reduction of  
995 susceptibility-induced BOLD sensitivity losses: a whole-brain analysis at 3 T and 1.5 T.  
996 *NeuroImage* 33:493–504.
- 997 Wunderlich K, Rangel A, O’Doherty JP (2009) Neural computations underlying action-based decision  
998 making in the human brain. *Proc Natl Acad Sci U S A* 106:17199–17204.
- 999 Yang X-H, Huang J, Zhu C-Y, Wang Y-F, Cheung EFC, Chan RCK, Xie G-R (2014) Motivational deficits in  
1000 effort-based decision making in individuals with subsyndromal depression, first-episode and  
1001 remitted depression patients. *Psychiatry Res* 220:874–882.

1002

1003 **Figures & Figure Legends**

1004 **Figure 1, Task and Behaviour**

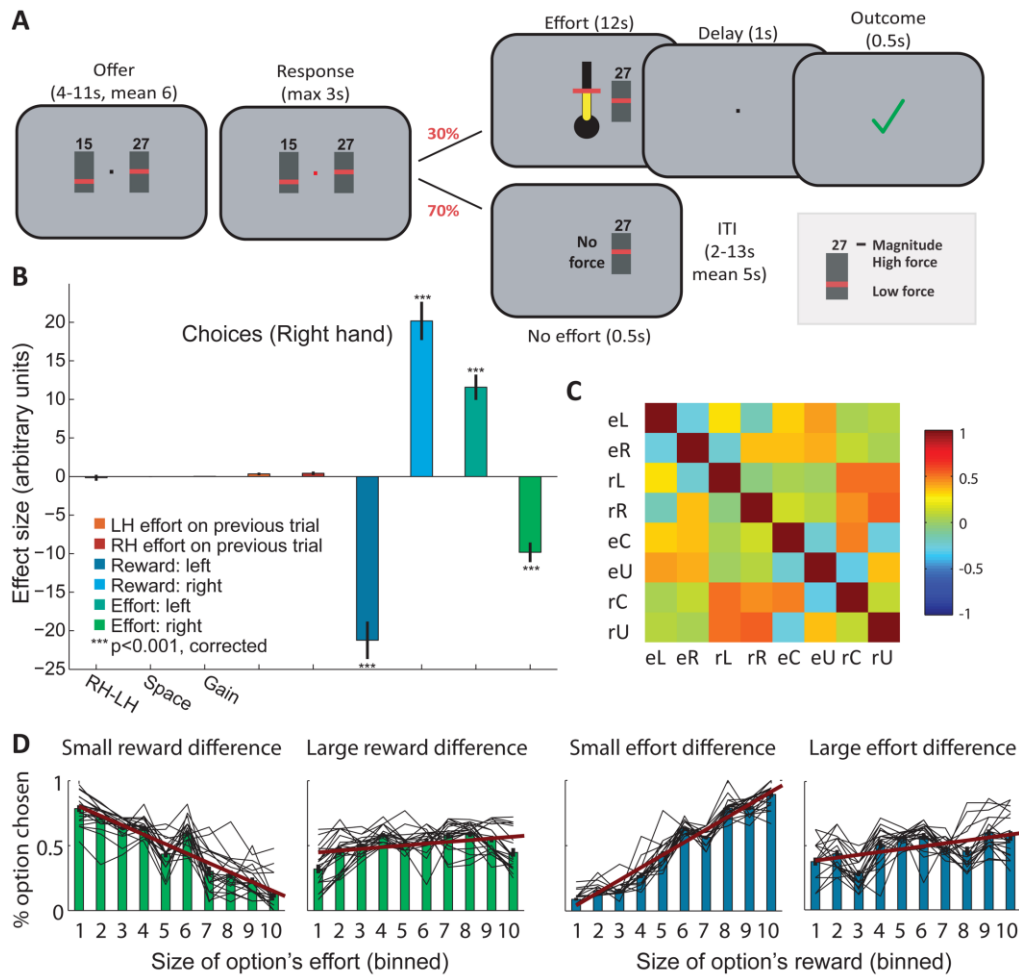

1005

1006           **A**, Human participants chose between two options associated with varying reward  
1007 magnitude (numbers) and physical effort (bar height translates into force, ‘Offer’). Once the  
1008 fixation cross turned red (‘Response’), participants were allowed to indicate their choice. Thus,  
1009 the time of choice computation was separable in time from the motor response. Following a  
1010 response, the effort had to be realised on an unpredictable 30% of trials (top). On these trials,  
1011 participants had to produce a 12s power grip at a strength proportional to the bar height of the  
1012 chosen option. Force levels were adjusted to individuals’ maximum force at the start of the  
1013 experiment. Participants received feedback about successful performance of the grip (99%  
1014 accuracy), and the rewards collected on successful trials were added to the total winnings. On  
1015 70% of trials (bottom), no effort was required and the next trial commenced (Inter-trial interval;  
1016 ITI). **B**, Participants’ choices were driven by both options’ reward magnitude and effort level  
1017 showing that all dimensions of the outcome were taken into account for computing a choice.  
1018 Benefits and costs had opposite effects: larger efforts discouraged and larger reward magnitudes  
1019 encouraged the choice of an option. Standard errors denote  $\pm$  SEM. **C**, Correlations between left  
1020 (L), right (R), chosen (C), and unchosen (U) effort levels (e) and reward magnitudes (m) show  
1021 that the regressors of interest were sufficiently decorrelated in our design. **D**, Effort has a strong  
1022 effect on choice in trials with small reward differences, but no effect when the reward difference  
1023 is large (green panels; median split on reward difference; effort binned for visualization).  
1024 Similarly, reward has a stronger effect in trials with small effort differences compared to trials  
1025 with large effort differences (blue panels). This shows that participants indeed trade-off effort  
1026 against reward and confirms that reward has a stronger and opposite effect compared to effort  
1027 (red slope), as shown in **B**. The black lines correspond to individual participants and suggest that  
1028 reward and effort were treated as continuous variables.

1029 **Figure 2, Neural signatures of effort choice comparison in SMA and dACC**

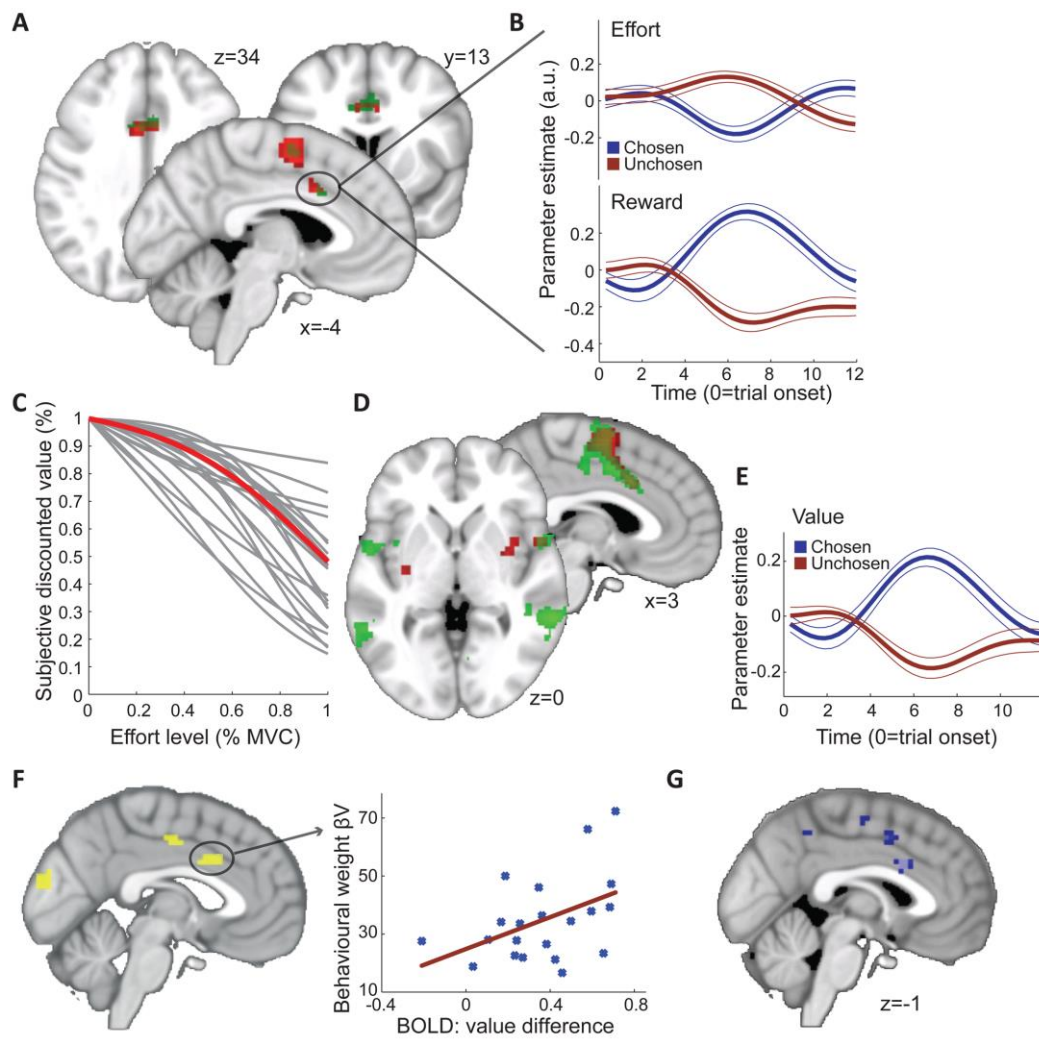

1030

1031           **A**, As a marker of choice computation, we identified regions encoding (a) the difference  
1032 between the chosen and unchosen reward magnitudes and (b) the inverse difference between the  
1033 chosen and unchosen effort levels. The conjunction of both contrasts in SPM (shown at  $p < 0.001$   
1034 uncorr.) revealed the supplementary motor area (SMA) and a region in the caudal portion of  
1035 dorsal anterior cingulate cortex (dACC) (both survive FWE-corr  $p < 0.05$ ). Cluster-level corrected  
1036 results obtained from FSL's Flame 1 ( $z > 2.3$ ,  $p < 0.05$ ) are overlaid in green to confirm this finding.  
1037           **B**, For illustration purposes, the two opposing difference signals are shown for the dACC cluster  
1038 on the right. Standard errors denote  $\pm$  SEM. **C**, A custom-built sigmoidal model was fitted to  
1039 participants' choices to obtain individual effort discounting curves (grey; red: group mean). In the  
1040 model, the subjective value of an option's reward (y-axis, represented in %) is discounted with  
1041 increasing effort levels (x-axis). This allowed inferring the subjective values ascribed to choice  
1042 options and modelling of subjective value in the BOLD data. **D**, The difference in subjective  
1043 value between the chosen and unchosen option, as derived from the behavioural effort  
1044 discounting model in C, was encoded in a similar network of regions as the combined difference  
1045 in reward magnitude and effort shown in A, including caudal dACC, SMA, bilateral putamen and  
1046 insula (shown at  $p < 0.001$  uncorr. as obtained with SPM; cluster-level corrected FSL results  
1047 overlaid in green for  $z > 2.7$ ,  $p < 0.05$ ). **E**, The subjective value difference signal extracted from the  
1048 dACC is shown for illustration (standard errors:  $\pm$  SEM). **F**, Left: Regions encoding subjective  
1049 value as in D but where the strength of this signal additionally correlated with the extent to which  
1050 value difference guided behaviour (inverse softmax temperature  $\beta_V$ ; shown at  $p < 0.01$  uncorr.;  
1051 only the dACC survives cluster-level FWE-corr  $p < 0.05$ ). Right: Illustration of the correlation in  
1052 dACC for visual display purposes only. The stronger the BOLD difference between the chosen  
1053 and unchosen option in this region, the more precisely participants' choices are guided by value  
1054 ( $\beta_V$ ). This suggests that the dACC's value signal computed at the time of choice is relevant for  
1055 guiding choices. **G**, Regions where the encoding of effort difference correlates, across subjects,  
1056 with a marker for the individual level of 'effort distortion' as captured by the parameters  $k$  and  $p$

1057 of the modelled discount function. The better an individual's subjectively experienced effort was  
1058 captured in the GLM (i.e., the less distorted their discount function), the stronger the inverse  
1059 effort difference signal in caudal dACC and SMA (light blue:  $p < 0.001$  uncorr; dark blue:  $p < 0.005$   
1060 uncorr; dACC /SMA survive cluster-level FWE-corr  $p < 0.05$ ). This suggests dACC and SMA  
1061 encode effort difference in the way it subjectively influences the choice.

1062

1063 **Figure 3, Model-derived value describes choice signals more accurately than model-free**  
1064 **value**

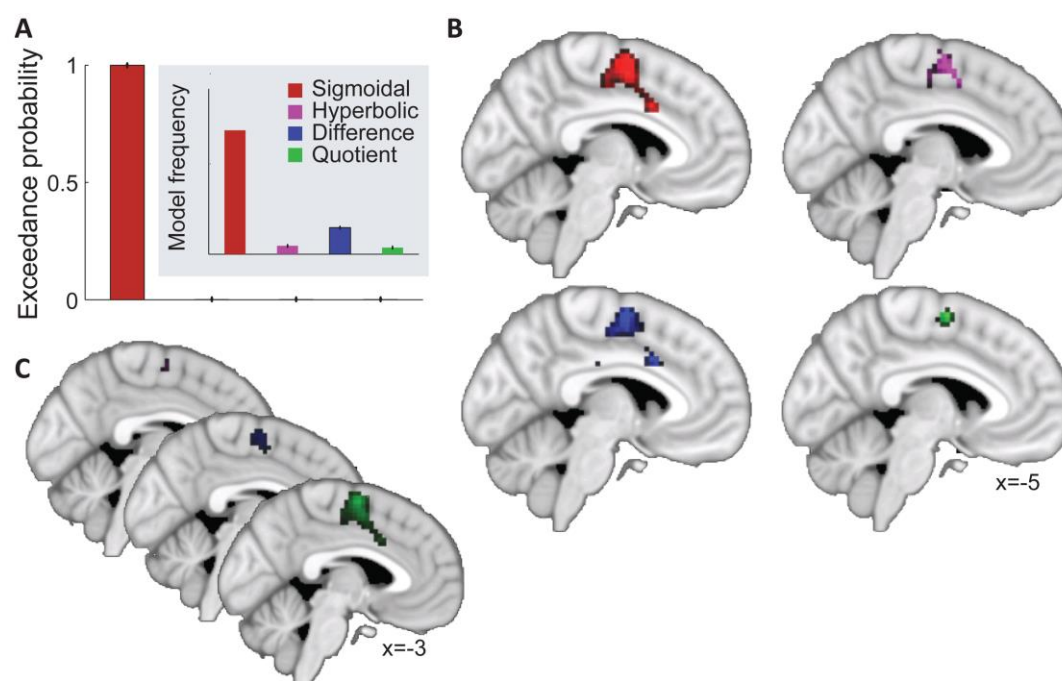

1065

1066           **A**, Bayesian model comparison for value modelled using the sigmoidal model, hyperbolic  
1067 model and two parameter-free descriptions of value – reward minus effort, and reward divided by  
1068 effort. The sigmoidal model captures choice behaviour best. **B**, Comparison of the BOLD  
1069 response to value difference for the behavioural sigmoidal model (red; like Figure 2D), the  
1070 hyperbolic model (purple), and the parameter-free descriptions of value (blue: reward-effort;  
1071 green: reward/effort; all shown at  $p < 0.001$  uncorr.). The three alternative contrasts reveal a  
1072 similar network albeit less strongly. **C**, Crucially, the sigmoidal model provides a significantly  
1073 better description of the BOLD signal in SMA, extending into caudal dACC, compared to all  
1074 other models. Purple: sigmoidal versus hyperbolic; blue: sigmoidal versus parameter-free  
1075 subtraction; green: sigmoidal versus parameter-free division (shown at  $p < 0.001$  uncorr.).  
1076



1077 **Figure 4, Distinct circuits bias choices towards reward maximization or effort minimization**

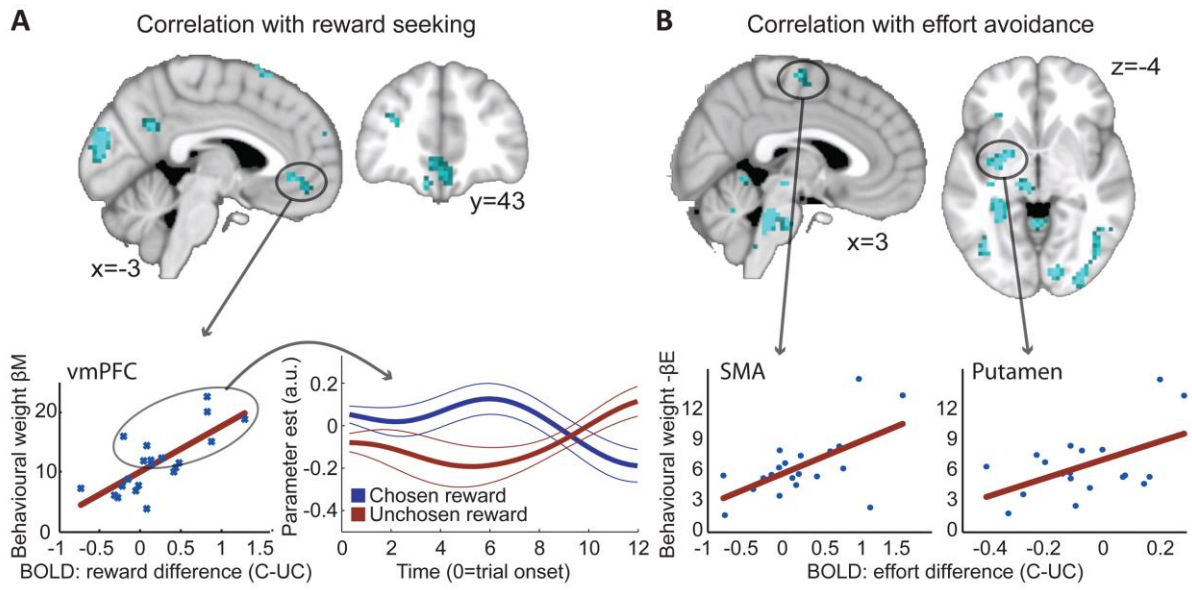

1078

1079           **A**, Regions where the encoding of reward magnitude difference varied as a function of  
1080 the behavioural weight participants placed on reward ( $\beta_M$ ; top: shown at  $p < 0.01$  uncorr.). This  
1081 showed that the BOLD signal in vmPFC (SVC FWE-corr,  $p < 0.05$ ) reflected the difference  
1082 between chosen and unchosen reward more strongly in participants who also placed a stronger  
1083 weight on maximising reward (top and bottom left). While we could not identify an average  
1084 reward difference coding in vmPFC across the group, the subset of participants who placed a  
1085 stronger weight on reward (larger  $\beta_M$ ; median split, ellipse) did encode the difference between the  
1086 chosen and unchosen reward magnitudes (bottom right). This suggests that vmPFC might bias  
1087 choices towards reward-maximization. Standard errors denote  $\pm$  SEM.**B**, A very distinct network  
1088 of regions including the SMA and putamen (both SVC FWE-corr,  $p < 0.05$ ) encoded effort  
1089 difference as a function of participants' behavioural effort weight ( $\beta_E$ ; shown at  $p < 0.01$  uncorr.).  
1090 This system was active more strongly in participants who tried to more actively avoid higher  
1091 efforts and has often been associated with effort evaluation. It might counteract the vmPFC-  
1092 circuit shown in A in order to achieve effort minimization, which is in constant conflict with  
1093 reward maximization in our task. Correlation plots (bottom) are only shown for visual illustration  
1094 of the effects for a priori regions of interest; no statistical analyses were performed on these data.

1095

1096

1097 **Figure 5, Opposite coding of relative choice value in dorsal medial frontal cortex**

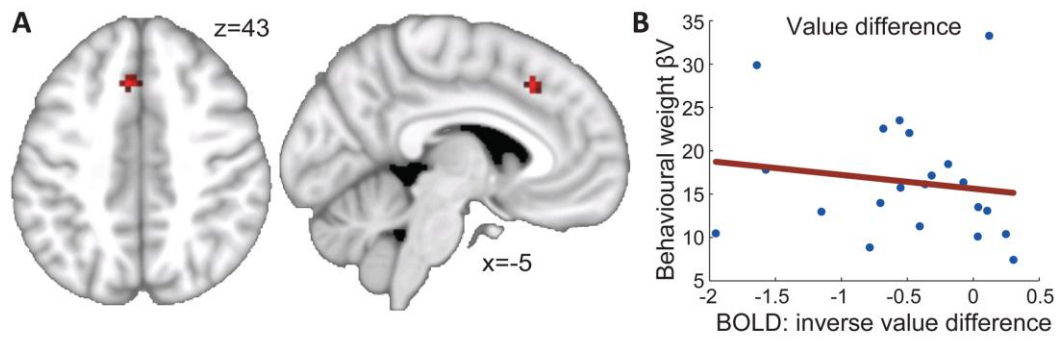

1098

1099           **A**, Regions where the BOLD signal encodes an inverse rather than a positive difference  
1100 between chosen and unchosen reward magnitudes and a positive rather than an inverse difference  
1101 between chosen and unchosen effort (i.e. the exact inverse of the conjunction shown in Figure  
1102 2A). The only region detected at a lenient threshold ( $p=0.01$  uncorr.; no regions survive FWE  
1103 correction) is a nearby but anatomically distinct region in medial prefrontal cortex (mPFC)  
1104 previously suggested to serve as a choice comparator (Wunderlich et al., 2009; Hare et al., 2011).  
1105           **B**, However, in this region, the BOLD signal does not relate to behaviour as was the case for the  
1106 caudal portion of dACC (see Figure 2F).
